# Supplementary material
Source: Research Square preprint supplement (doi:10.21203/rs.3.rs-8388938/v1)
Supplement: Supplementary file 1 [file 025866ce27c7652c3c0f496c.xlsx]

## Sheet: DnaB
DnaB	closed dilated form PDB code: 9XX5 EMDB code: EMD-67349	closed constrict form PDB code: 9XXL EMDB code: EMD-67366	open constrict form PDB code: 9XXP EMDB code:EMD-67367	heptamer CI PDB code: 9XXQ EMDB code: EMD-67372	heptamer CII PDB code: 20XN EMDB code: EMD-67381	heptamer CIII PDB code: 21CM EMDB code: EMD-67572	octamer PDB code: 9XXS EMDB code: EMD-67373
Data collection and preprocessing
Magnification	×105,000	×105,000	×105,000	×105,000	×105,000	×105,001	×105,000
Voltage(kV)	300	300	300	300	300	300	300
Electron exposure(e-/Å2)	50	50	50	50	50	50	50
Pixel size (Å)	0.827	0.827	0.827	0.827	0.827	0.827	0.827
Symmetry imposed	C3	C3	C1	C1	C1		C1
final particles	23251	47699	52035	46020	45068	84528	32859
Map resolution(Å)	6.07	6.66	3.88	3.96	3.95	3.69	6.28
FSC threshold	0.143	0.143	0.143	0.143	0.143	0.143	0.143
Refinement
Model resolution range (Å)	5.7/6.2/8.3	5.2/6.5/8.6	3.4/3.9/4.5	3.4/4.0/4.6	3.3/3.9/6.3	3.3/3.6/4.3	5.0/6.2/7.5
Model
Bonds (RMSD)
Length (Å) (# > 4σ)	0.010 (0)	0.006 (0)	0.007 (0)	0.005 (0)	0.006 (0)	0.006 (0)	0.004 (0)
Angles (°) (# > 4σ)	1.235 (0)	1.085 (0)	1.341 (0)	1.218 (0)	1.164 (0)	1.314 (0)	0.920 (0)
MolProbity score	2.02	2.3	2.13	1.96	1.9	1.68	1.99
Clash score	19.1	26.96	21.59	14.36	14.43	8.35	15.76
Ramachandran plot (%)
Outliers	0.41	0.19	0.42	0.1	0.14	0.07	0.2
Allowed	3.17	5.38	3.93	4.13	3.45	3.43	3.98
Favored	96.42	94.43	95.65	95.77	96.42	96.5	95.82
Rama-Z
whole (N = 2654)	0.84 (0.17)	-0.32 (0.17)	-1.45 (0.16)	-0.77 (0.15)	-1.84 (0.15)	-1.56 (0.16)	-1.33 (0.14)
helix (N = 1448)	1.17 (0.14)	0.57 (0.14)	-0.05 (0.15)	0.18 (0.14)	-1.07 (0.13)	-0.79 (0.14)	-0.04 (0.13)
sheet (N = 255)	-0.36 (0.33)	-1.25 (0.32)	-1.03 (0.32)	0.74 (0.29)	0.18 (0.29)	0.23 (0.31)	-0.64 (0.29)
loop (N = 951)	0.05 (0.20)	-0.95 (0.21)	-1.94 (0.18)	-1.57 (0.17)	-1.69 (0.16)	-1.55 (0.18)	-1.69 (0.15)
Rotamer outliers (%)	0.93	0.35	0.64	0.39	0.56	0.04	0.1
Cβ outliers (%)	NA	NA	NA	NA	NA	NA	NA
Peptide plane (%)
Cis proline/general	0.0/0.2	0.0/0.0	0.0/0.0	0.0/0.0	0.0/0.0	0.0/0.0	0.0/0.0
Twisted proline/general	0.0/0.0	0.0/0.0	0.0/0.0	0.0/0.0	0.0/0.0	0.0/0.0	0.0/0.0
CaBLAM outliers (%)	1.86	2.95	4.88	4.72	4.28	4.54	5.44
ADP (B-factors)
Iso/Aniso (#)	20838/0	20838/0	18902/0	23564/0	23386/0	21273/0	28152/0
min/max/mean
Protein	304.89/1019.70/559.88	130.89/366.61/195.02	30.00/798.10/222.03	29.83/855.44/221.78	30.00/884.69/237.65	0.00/952.21/196.22	20.48/629.88/173.15
Nucleotide	---	---	---	---	---	---	---
Ligand	---	---	123.63/465.41/234.19	81.88/372.44/207.59	130.47/367.54/187.59	126.53/346.39/211.60	75.87/248.03/173.53

## Sheet: DNA
	DNA-bound DnaB(CI6ATP) PDB code: 9XWZ EMDB code: EMD-67344	DNA-bound DnaB(CI5ATP) PDB code: 9XX4 EMDB code: EMD-67348	DNA-bound DnaB(CII6ATP) PDB code: 9XX3 EMDB code: EMD-67347
Data collection and preprocessing
Magnification	×105,000	×105,000	×105,000
Voltage(kV)	300	300	300
Electron exposure(e-/Å2)	50	50	50
Pixel size (Å)	0.827	0.855	0.855
Symmetry imposed	C1	C1	C1
final particles	48908	39514	77999
Map resolution(Å)	3.65	3.78	3.87
FSC threshold	0.143	0.143	0.143
Refinement
Model resolution range	3.0/3.3/4.0	3.1/3.5/4.1	3.2/3.5/4.1
Model
Bonds (RMSD)
Length (Å) (# > 4σ)	0.005 (0)	0.006 (0)	0.006 (0)
Angles (°) (# > 4σ)	1.174 (0)	1.161 (0)	1.145 (0)
MolProbity score	1.96	1.68	1.9
Clash score	12.62	11.38	11.66
Ramachandran plot (%)
Outliers	0.11	0.11	0.08
Allowed	4.96	2.46	4.48
Favored	94.92	97.43	95.45
Rama-Z
whole (N = 2657)	-0.40 (0.16)	0.42 (0.17)	0.26 (0.17)
helix (N = 1362)	0.33 (0.14)	0.96 (0.14)	0.86 (0.15)
sheet (N = 350)	0.11 (0.27)	0.57 (0.27)	0.39 (0.28)
loop (N = 945)	-1.10 (0.20)	-0.79 (0.21)	-0.83 (0.21)
Rotamer outliers (%)	0.4	0.4	0.36
Cβ outliers (%)	NA	NA	NA
Peptide plane (%)
Cis proline/general	0.0/0.0	0.0/0.0	0.0/0.0
Twisted proline/general	0.0/0.0	0.0/0.0	0.0/0.0
CaBLAM outliers (%)	2.57	2.28	3.4
ADP (B-factors)
Iso/Aniso (#)	21539/0	21092/0	21145/0
min/max/mean
Protein	17.18/576.85/138.81	30.00/306.74/166.55	30.00/684.40/150.55
Nucleotide	20.00/243.71/115.52	88.24/243.95/128.80	42.49/131.06/72.20
Ligand	38.48/126.51/74.32	58.02/169.44/95.60	53.95/372.49/133.09

## Sheet: DnaG
	DnaBG(C1apo) PDB code: 9XW1 EMDB code: EMD-67319	DnaBG(C26ATP) PDB code: 9XVU EMDB code: EMD-67302	DnaBG(C36ATP) PDB code: 9XVT EMDB code: EMD-67301	DnaBG(C45ATP) PDB code: 9XVB EMDB code: EMD-67285
Data collection and preprocessing
Magnification	×105,000	×105,000	×105,000	×105,000
Voltage(kV)	300	300	300	300
Electron exposure(e-/Å2)	50	50	50	50
Pixel size (Å)	0.855	0.827	0.827	0.827
Symmetry imposed	C3	C3	C1	C1
final particles	67602	101779	32063	37132
Map resolution(Å)	3.69	3.67	5.95	4.36
FSC threshold	0.143	0.143	0.143	0.143
Refinement
Model resolution range	3.2/3.7/6.0	3.3/3.5/3.9	3.9/4.4/7.0	3.9/4.4/7.0
Model
Bonds (RMSD)
Length (Å) (# > 4σ)	0.003 (0)	0.005 (0)	0.005 (0)	0.005 (0)
Angles (°) (# > 4σ)	0.754 (0)	0.796 (0)	0.765 (0)	0.765 (0)
MolProbity score	1.96	1.97	1.87	1.87
Clash score	13.07	13.44	15.01	15.01
Ramachandran plot (%)
Outliers	0.03	0.13	0.29	0.29
Allowed	4.74	4.67	2.86	2.86
Favored	95.23	95.21	96.85	96.85
Rama-Z
whole (N = 3101)	0.07 (0.15)	0.04 (0.15)	0.44 (0.15)	0.44 (0.15)
helix (N = 1681)	0.80 (0.13)	0.80 (0.13)	0.63 (0.13)	0.63 (0.13)
sheet (N = 338)	-0.60 (0.27)	-0.66 (0.30)	-0.37 (0.27)	-0.37 (0.27)
loop (N = 1082)	-0.79 (0.19)	-0.87 (0.19)	0.26 (0.20)	0.26 (0.20)
Rotamer outliers (%)	0	0.11	0.22	0.22
Cβ outliers (%)	NA	NA	NA	NA
Peptide plane (%)
Cis proline/general	0.0/0.2	0.0/0.2	0.0/0.2	0.0/0.2
Twisted proline/general	0.0/0.0	0.0/0.0	0.0/0.0	0.0/0.0
CaBLAM outliers (%)	2.3	2.65	1.71	1.71
ADP (B-factors)
Iso/Aniso (#)	24459/0	24702/0	24952/0	24952/0
min/max/mean
Protein	16.82/288.64/144.74	18.96/357.61/199.25	46.64/1240.20/367.50	46.64/1240.20/367.50
Nucleotide	---	---	148.96/302.49/192.38	148.96/302.49/192.38
Ligand	---	238.05/305.25/273.74	235.86/377.71/285.14	235.86/377.71/285.14
