# Supplementary material
Source: Research Square preprint supplement (doi:10.21203/rs.3.rs-8388938/v1)
Supplement: Supplementary file 2 [file ab088ed28e685c83b7e8e5d3.docx]

**Materials and Methods**

**Cloning, Expression, and Purification of N-terminal 6× His-tagged DnaB**

The DNA fragment encoding DnaB (PA4931) from *Pseudomonas aeruginosa* PAO 1 was cloned into a pET28a vector using a seamless cloning strategy, incorporating an N-terminal 6× His tag for purification. The resulting ligation product was transformed into our homemade *E. coli* DH5α competent cells and spread on a solid Lysogeny Broth (LB) agar plate supplemented with a final concentration of 50 μg/mL kanamycin (Solarbio, China). Positive single colonies, verified by colony PCR, were inoculated into 5 mL of liquid LB medium with kanamycin (50 μg/mL) for small-scale culture. Plasmid DNA was subsequently extracted from the cells mentioned above and sent for commercial sequencing to confirm the sequence. The verified plasmid was then transformed into the chemically competent *E. coli* BL21(DE3) strain (Yeasen, China). Following transformation, the cells were resuspended in SOC medium and recovered in a shaker at 180 rpm and 37°C for 1 hour. The cells were collected by centrifugation at 3,500 × g for 5 minutes, and the pellet was resuspended in the remaining ~100 µL of medium before being spread on an LB agar plate containing 50 μg/mL kanamycin. Multiple single colonies were picked to inoculate 10 mL of LB starter cultures (with 50 μg/mL kanamycin) and grown overnight at 37°C. These starter cultures were then diluted 1:100 into 1 L of fresh LB medium (with 50 μg/mL kanamycin) and grown at 220 rpm and 37°C until the OD600 reached approximately 0.8. Protein expression was induced by adding isopropyl β-D-1-thiogalactopyranoside (IPTG) (Solarbio, China) to a final concentration of 0.5 mM and subsequently cultured at 220 rpm and 16°C for 18 hours. After induction, the cells were harvested by centrifugation at 12,000 × g for 3 minutes. The cell pellet was resuspended in lysis buffer containing 50 mM HEPES, 300 mM NaCl, 5 mM potassium acetate, 10 mM MgCl₂, 1 mM DTT, 5% (v/v) glycerol, and 1 mM PMSF (pH 7.5). Cell lysis was performed using a high-pressure homogenizer at 800 MPa and 5°C. The lysate was clarified by centrifugation at 12,000 × g for 1 hour, and the supernatant was collected. The N-terminal 6× His-tagged DnaB protein was initially purified from the supernatant by Immobilized Metal Affinity Chromatography (IMAC) using a Ni-NTA column (Vazyme, China). The eluted protein was concentrated and further purified using a Superose Increase column 16/300 (Cytiva, USA) and a gel filtration method, with a buffer composed of 50 mM HEPES and 300 mM NaCl (pH 7.5). SDS-PAGE was used to assess the purity and molecular weight of the target protein, and the final protein concentration was determined by measuring the absorbance at 280 nm (OD280) using a NanoDrop spectrophotometer (Thermofisher Scientific, USA).

**Co-expression and Purification of C-terminal Strep II-tagged DnaB and Untagged DnaG**

cDNA fragments encoding *Pseudomonas aeruginosa* PAO1 DnaB and DnaG (PA0577) were individually cloned into pET28a (kanamycin-resistant) and pET22bN (ampicillin-resistant) vectors, respectively, utilizing the seamless cloning method. Because N-terminally 6× His-tagged DnaB immobilized on nickel affinity resin failed to pull down DnaG from the clarified lysate, a Strep II tag was introduced at the C terminus of DnaB. At the same time, DnaG was constructed without any affinity tag. The ligation products were transformed into *E. coli* DH5α competent cells, followed by recovery in LB liquid medium, then plated on a solid LB agar plate supplemented with either 50 μg/mL kanamycin (Solarbio, China) or 100 μg/mL ampicillin (Solarbio, China), as appropriate. Positive clones, validated by PCR screening, were inoculated into 5 mL LB medium for subsequent plasmid extraction and sequencing. pET28a-DnaB-C-terminal Strep II and pET22bN-DnaG plasmids were co-transformed into *E. coli* BL21(DE3) chemically competent cells (Yeasen, China). Several clones were selected on LB agar plates containing both 50 μg/mL kanamycin and 100 μg/mL ampicillin, further inoculated into 10 mL of LB medium supplemented with both antibiotics, and cultured at 220 rpm and 37 °C for 4-6 hours. These starter cultures were then diluted 1:100 into 1 L of fresh LB medium supplemented with 50 μg/mL kanamycin and 100 μg/mL ampicillin. When the OD600 reached approximately 0.8, protein expression was induced by adding a final concentration of 0.5 mM IPTG (Solarbio, China). The cells were then incubated at 220 rpm and 16°C for 20 hours. Cells were harvested by centrifugation at 12,000 × rcf for 3 minutes, and the pellets were resuspended in lysis buffer containing 50 mM HEPES, 300 mM NaCl, 5 mM potassium acetate, 10 mM MgCl₂, 1 mM DTT, 5% (v/v) glycerol, and 1 mM PMSF (pH 7.5). Cell lysis was performed using a high-pressure homogenizer operated at 800 MPa and 5 °C. The lysate was centrifuged at 12,000 × rcf for ~1 hour, and the supernatant was collected and further incubated with Strep-Tactin® agarose resin (AlpaLifeBio, China) for 15 minutes. The resin was then washed with five column volumes of lysis buffer, and the target protein complex was finally eluted with lysis buffer supplemented with a final concentration of 50 mM biotin (Beyotime, China). The eluate was concentrated to ~1 mL and further purified by size-exclusion chromatography (SEC) using a Superose™ Increase column 16/300 (Cytiva, USA) on an ÄKTA™ pure system (Cytiva, USA) and a buffer containing 50 mM HEPES and 300 mM NaCl (pH 7.5). SDS-PAGE was used to assess the purity and molecular weight of the proteins, and protein concentrations were determined by measuring the absorbance value at 280 nm using a NanoDrop spectrophotometer (ThermoFisher Scientific, USA).

**Cloning, Expression, and Purification of C-terminal 6× His-tagged DnaG**

The cDNA fragment encoding DnaG was cloned into the pET22bN vector using seamless cloning, incorporating a C-terminal 6× His tag. The ligation mixture was transformed into *E. coli* DH5α competent cells, followed by recovery, plating, inoculation, plasmid purification, and confirmation by sequencing. The recombinant plasmid was subsequently transformed into the expression host *E. coli* BL21(DE3) (Yeasen, China). Protein expression was induced at an OD600 of approximately 0.8 by adding a final concentration of 0.5 mM IPTG (Solarbio, China), followed by incubation at 220 rpm and 16°C for 16 hours. Cells were harvested and resuspended in lysis buffer containing 50 mM HEPES, 300 mM NaCl, 5 mM potassium acetate, 10 mM MgCl₂, 1 mM DTT, 5% (v/v) glycerol, and 1 mM PMSF (pH 7.5). The cell suspension was lysed using a high-pressure homogenizer at 800 MPa and 5°C, and the lysate was centrifuged at 12,000 × rcf to collect the supernatant, which was subjected to an IMAC Ni‑NTA column (Vazyme, China). The eluted protein was concentrated and further purified by SEC on a Superose™ 6 Increase 16/300 column (Cytiva, USA) equilibrated with 50 mM HEPES and 300 mM NaCl (pH 7.5). Protein purity, molecular weight, and concentration were assessed as described previously.

**Assay for Helicase DnaB-mediated Unwinding of double-stranded DNA**

To detect helicase DnaB-mediated unwinding of double-stranded DNA, a biotin-labeled partial duplex DNA substrate was first prepared by annealing complementary oligonucleotides. Helicase reactions were carried out by incubating 1.5 μM DnaB with the DNA substrate in reaction buffer (50 mM HEPES and 300 mM NaCl (pH 7.5)) containing a final concentration of 10 mM ATP and Mg²⁺. The experimental groups consisted of three reaction time points: 10 min, 20 min, and 30 min. A parallel negative control reaction lacking ATP was also included. Reaction products were resolved by non-denaturing polyacrylamide gel electrophoresis (native-PAGE) and subsequently transferred to a positively charged nylon membrane via electroblotting. The chemiluminescent detection procedure begins by blocking the membrane for 15 minutes. The membrane is then incubated for 15 minutes with a 1:300 dilution of Streptavidin-Horseradish Peroxidase conjugate in blocking buffer. After a brief rinse, the membrane is subjected to four 5-minute washes with 1X wash buffer. Following a 5-minute equilibration, the membrane is incubated with the prepared chemiluminescent substrate working solution for 5 minutes in a light-proof box. The moist membrane is then wrapped in plastic and exposed to a CCD imager for signal detection. The detection kit used in this assay is Chemiluminescent Nucleic Acid Detection Module (cat NO. 89880) (ThermoFisher Scientific, USA). All experimental designs and procedures should follow the protocol offered by the manufacturer.

**Cryo-EM Grid Preparation for unliganded DnaB and Its Complex with Different Substrates**

The peak fraction from the SEC elution was collected and diluted with the equilibration buffer (50 mM HEPES, 300 mM NaCl, pH 7.5) to a final protein concentration of 1.5 mg/mL. 4.5 μL of the sample was applied to a Cu 1.2/1.3 300 mesh grid (Quantifoil, USA), which Cryo-tweezers held and further mounted onto a vertically movable metal rod located in the sample chamber of Cryo Plunge Freezer-Vitrobot (FEI, USA) at 4 °C and 100% humidity. The grid had been freshly hydrophilized using a PELCO EasiGlow™ Glow Discharge Cleaning System (TED PELLA, USA) at 15 mA for 45 s. The vitrification parameters of the Vitrobot Mark IV system (Thermofisher Scientific, USA) were as follows: blot time 3.5 s, wait time 15 s, and blot force 2. Subsequently, the grid was immediately plunged into liquid ethane cooled by liquid nitrogen, stored in a Cryo-box under liquid nitrogen, and kept for subsequent data collection.

For the ligand-bound DnaB Cryo-EM grid preparation, the SEC peak fraction was incubated with a 1.2-fold molar excess of the ATP analog ANP (Macklin, China) for 0.5 hours. The Cryo-grid was then prepared following the same protocol as described for the apo DnaB sample, and the vitrified grid was stored in liquid nitrogen.

To form the polyT ssDNA-bound complex, the protein from the concentrated Ni–NTA elution was incubated with polyT ssDNA (5ʼ-TTTTTTTTTTTT-3ʼ) and ANP at a 1:1.2:1.2 molar ratio at 4 ℃ for 1 hour. The mixture was further purified by SEC using a Superose™ 6 Increase 16/300 column (Cytiva, USA) equilibrated with 50 mM HEPES and 300 mM NaCl (pH 7.5). The peak fraction was collected, diluted with the SEC equilibration buffer to a final concentration of 1.5 mg/mL, and then 4.5 μL of the sample was applied to a glow-discharged Cu 2/1 300 mesh grid (Quantifoil, USA). The vitrification parameters of Vitrobot were as follows: blot time 3.5 s, wait time 10 s, and blot force 1. After blotting, the grid was immediately plunged into liquid ethane cooled by liquid nitrogen, followed by storage in liquid nitrogen.

To get the complex with polyTA dsDNA, the concentrated Ni–NTA elution was first incubated with the polyT ssDNA (5ʼ-TTTTTTTTTTTTTTTTTTTT-3ʼ) and ANP (molar ratio 1:1.2:1.2) on ice for one hour, following purification by gel filtration under the same conditions as described above. The polyA ssDNA (5ʼ-AAAAAAAAAAAA-3ʼ) was added to the concentrated fraction at a molar ratio of 1:1.2 (protein:polyA) immediately and incubated for 0.5 hour before grid preparation. The Cu 2/1 300 mesh grid (Quantifoil, USA) had been freshly hydrophilized using a PELCO EasiGlow™ Glow Discharge Cleaning System (TED PELLA, USA) at 15 mA for 30 s. The subsequent Cryo-grid preparation steps were identical to those used for the ssDNA-bound DnaB sample. All ssDNA oligonucleotides used in this study were synthesized and purified by Beijing Tsingke Biotech Co., Ltd.

**Cryo-EM Grid Preparation for Unliganded DnaB-DnaG and Their complex with Different Substrates**

The peak fraction of the DnaB-DnaG complex from gel filtration was concentrated to a final concentration of 2.5 mg/mL. A 4.5 μL aliquot of the protein sample was applied to a glow-discharged Cu 2/1 300 mesh grid (Quantifoil, USA) that was treated at 15 mA for 45 s for hydrophilization. The grid was further processed using a Vitrobot Mark IV system (Thermo Fisher Scientific, USA) with the following parameters: blot time, 3.5 s; wait time, 10 s; and blot force, 2 at 4°C and 100% humidity. After blotting, the grid was immediately plunged into liquid ethane cooled by liquid nitrogen for vitrification. The vitrified grid was then transferred to a Cryo-box and maintained under liquid nitrogen for future use.

For the ANP-bound DnaB-DnaG complex, the concentrated sample corresponding to the SEC peak fraction was first incubated with a 1.2-fold molar excess of ANP on ice for 30 min. The mixture was then diluted with SEC equilibration buffer (50 mM HEPES, 300 mM NaCl, pH 7.5) to a final concentration of 1.5 mg/mL. Subsequent grid preparation steps followed the same procedure as for the unliganded DnaB-DnaG complex.

To prepare the polyT-bound DnaB-DnaG complex, the DnaB-DnaG complex was incubated with a polyT ssDNA (5ʼ-TTTTTTTTTTTT-3ʼ) and ANP at a molar ratio of 1:1.2:1.2 at 4 ℃ for 30 min. The mixture was diluted with SEC equilibration buffer to 2 mg/mL. The grid was first glow-discharged at 15 mA for 30 s. All subsequent steps were identical to those for the apo DnaB-DnaG, with the following parameters for the Vitrobot Mark IV system (Thermofisher Scientific, USA): blot time, 3.5 s; wait time, 15 s; and blot force, 2 at 4°C and 100% humidity. All ssDNA oligonucleotides used in this study were synthesized and purified by Beijing Tsingke Biotech Co., Ltd.

**Cryo-EM Single Particle Analysis Data Collection**

Data acquisition was performed on a 300 kV ThermoFisher Scientific (USA) Titan Krios transmission electron microscope (TEM, No. 2 and No. 4 included) at the Southern University of Science and Technology (SUSTech) Cryo-EM Microscopy Center. Two transmission electron microscopes were equipped with a high-speed direct detection K3 camera and a Gatan BioQuantum energy filter system. The spherical aberration for two TEMs was 2.7mm. Movies were recorded in super-counted mode (binning 2) at a nominal magnification of 105,000×, resulting in a pixel size of 0.827 Å (for No. 4 TEM, or 0.855 Å for No. 2 TEM) with a slit width of 20 eV and a total dose of 50 e-/Å². Meanwhile, the defocus list was set between -2.0μm and -1.2μm with a step of 0.2μm. Automated data collection for all Cryo-grids was carried out using the EPU 2.3 software.

**Cryo-EM Data Processing and Reconstruction**

The practical data processing workflow is highly intricate and tedious, yet the core processing steps remain largely similar, as outlined below. Single-particle cryo-EM data processing was primarily performed in CryoSPARC (v4.5)1. Beam-induced motion correction was carried out using the Patch Motion Correction job, followed by patch-based contrast transfer function (CTF) estimation in CryoSPARC. Particles were typically selected through an iterative workflow using a combination of blob picking, template-based picking, and reference-free particle selection, implemented in Topaz. The extracted particles were subjected to several rounds of reference-free 2D classification to remove non-particle and low-quality classes. An initial 3D model was generated via Ab-Initio reconstruction job. Subsequent heterogeneous refinement was employed to further classify particles into structurally distinct subsets utilizing the Hetero Refinement job. Followed by NU-Refine job (and CTF refinement) to improve the reconstruction quality. In some cases, a 3D Class job would be performed to further classify similar conformations. Selected particles underwent a second-round non-uniform refinement to improve the quality of the reconstruction maps further. Final reconstruction maps were sharpened using global filtering. All reconstructions were validated according to the gold-standard Fourier shell correlation (FSC) criterion at a cutoff of 0.1432. Readers are directed to **Supplementary Data Fig. 1-19** for further details regarding data preprocessing and analysis.

Model Building and Refinement

The initial model by the AlphaFold Server3. However, AlphaFold Server and its similar tools failed to predict DnaB structures of other states. Considering that each protomer comprises a stable NTD and a conserved CTD, structures of which are all relatively rigid. Thus, starting models for closed constrict hexamer, open constrict hexamer, closed constrict heptamer, and closed constrict octamer are all generated by docking the isolated C-terminal domain and N-terminal domain of DnaB into the refined Cryo-EM maps using a GPU-accelerated differentiable fitting algorithm as implemented by DiffFit4,5. The model was then iteratively refined using Coot for manual adjustments and phenix.real_space_refinement for automated refinement6,7. The model was refined utilizing a combination of stereochemical, rotamer, and secondary structure restraints. The computational strategies employed comprised atomic displacement parameter (ADP) refinement, occupancy refinement, energy minimization, morphing, and simulated annealing. Model quality was assessed using the MolProbity tool as implemented by the Comprehensive validation (cryo-EM) module in the PHENIX suite6,8. Structural visualizations and figure preparation for all structures were performed in ChimeraX4. And statistics for data collection and structure refinement of DnaB, DnaG, DnaB-DnaG, and their associated complexes are summarized in **Supplementary Tables 1-3.**


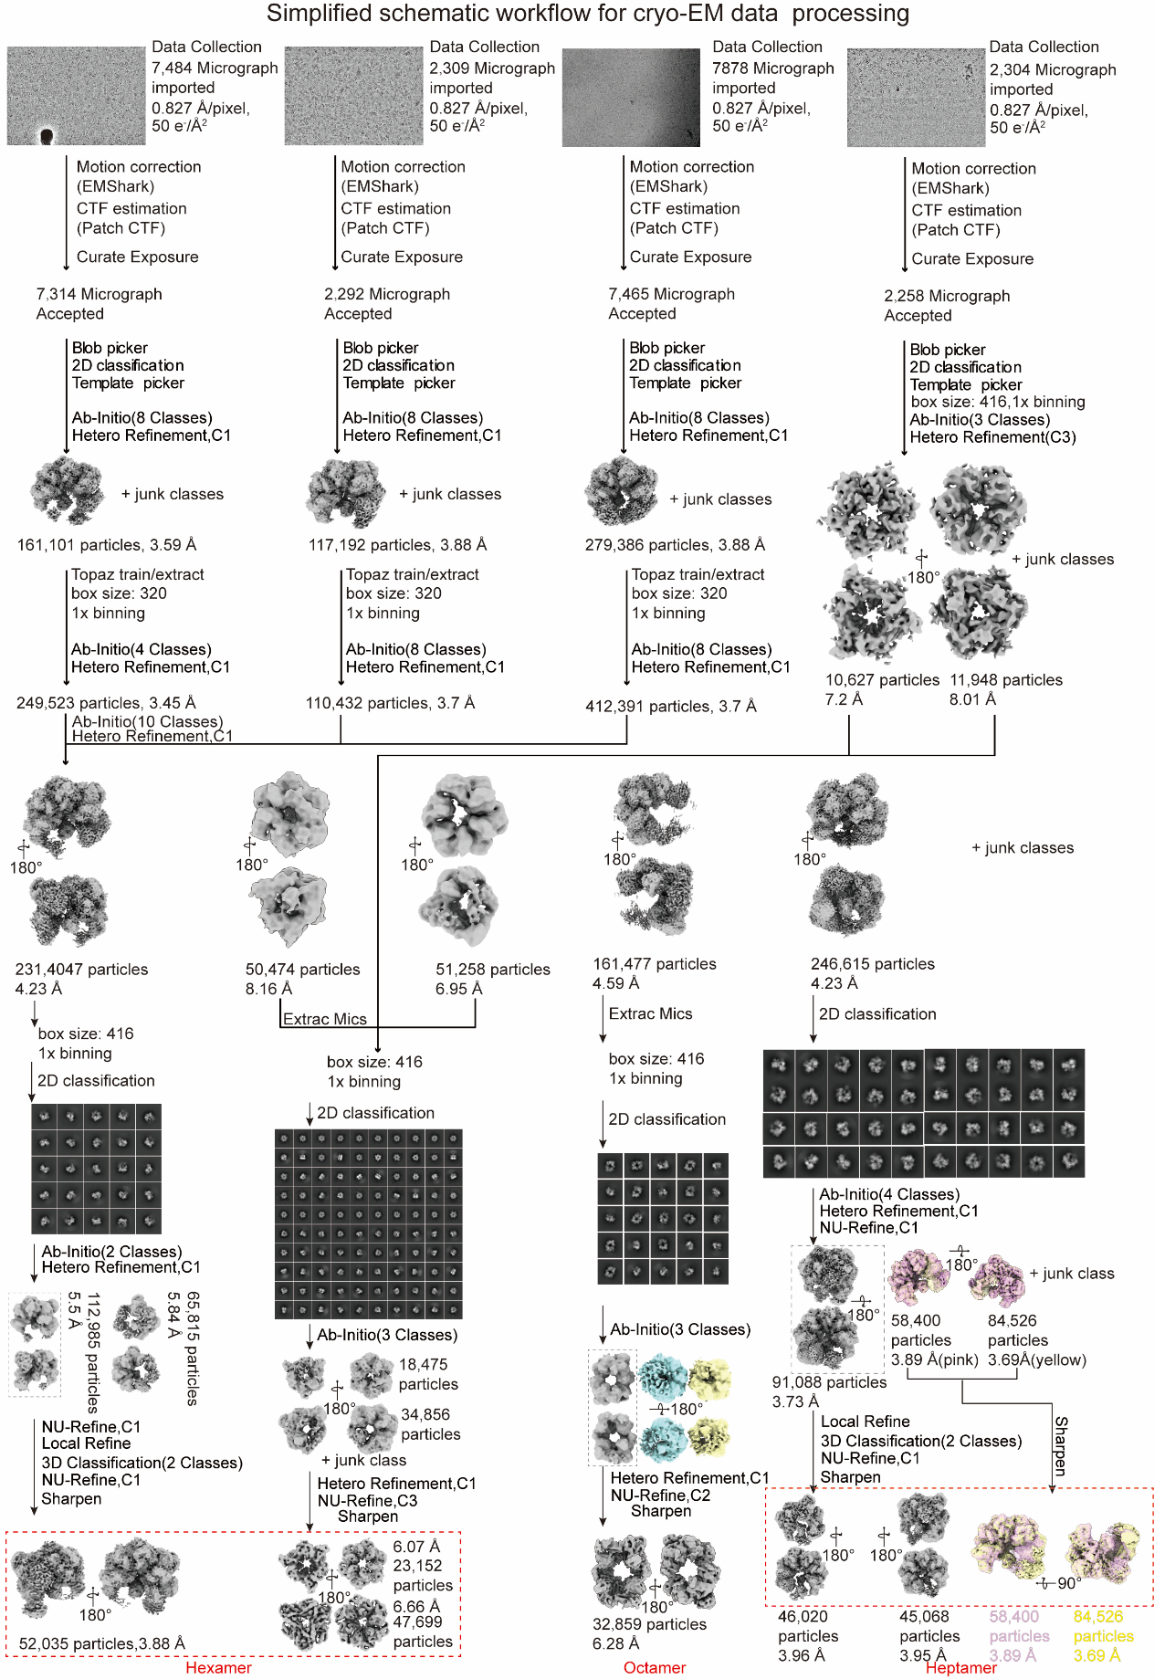


**Supplementary Data Fig. 1. The simplified Cryo-EM processing pipeline for single particle datasets of ANP-free and ANP-bound *Pa*DnaB oligomer.** Schematic workflow outlining main steps for Cryo-EM data collection and processing for *Pa*DnaB hexamers in closed dilated, closed constrict, and open constrict states, heptamers in closed or open constrict states, and octamers in closed constrict state.


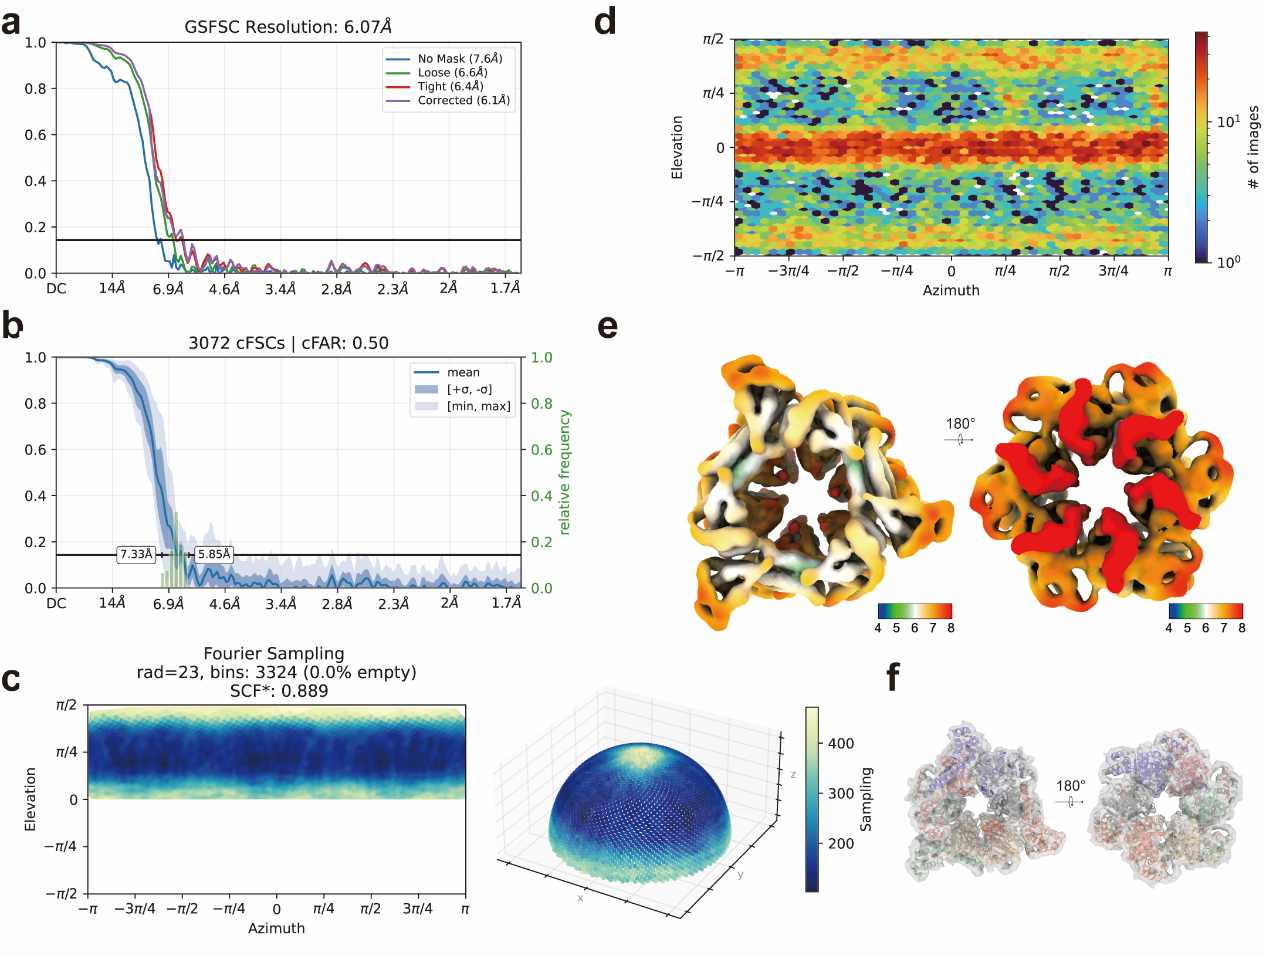


**Supplementary Data Fig. 2. The CryoSPARC analysis for single particle datasets of *Pa*DnaB hexamer in closed dilated state. a.** Gold-standard Fourier shell correlation (FSC). **b.** The conical FSC curves and the conical FSC area ratio. **c.** Fourier sampling and Sampling compensation factor. **d.** Viewing direction distribution. **e.** Two views of the Cryo-EM map that were colored by local resolution.


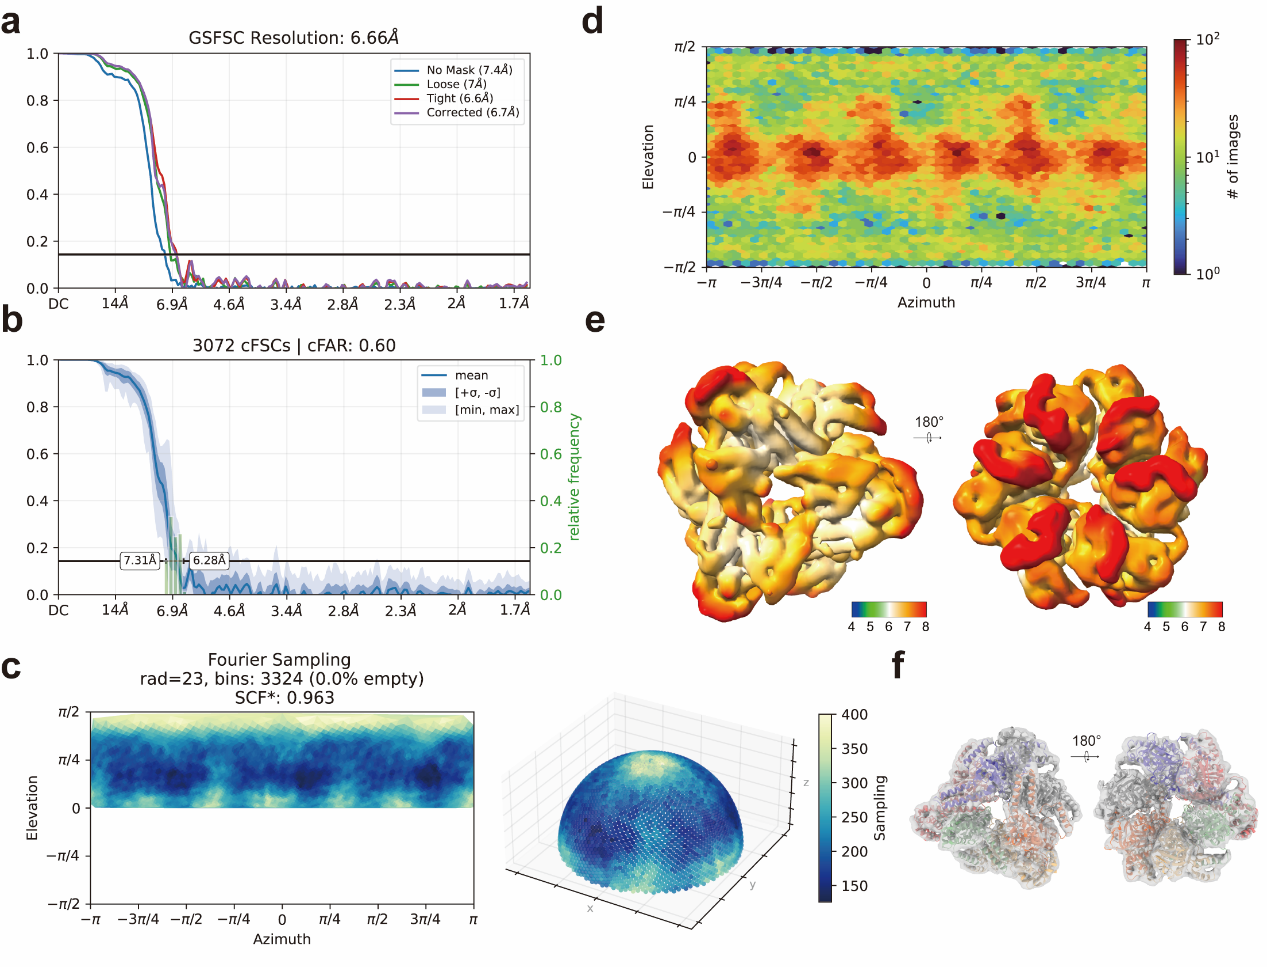


**Supplementary Data Fig. 3. The CryoSPARC analysis for single particle datasets of *Pa*DnaB hexamer in closed constrict state. a.** Gold-standard Fourier shell correlation (FSC). **b.** The conical FSC curves and the conical FSC area ratio. **c.** Fourier sampling and Sampling compensation factor. **d.** Viewing direction distribution. **e.** Two views of the Cryo-EM map, colored by local resolution.


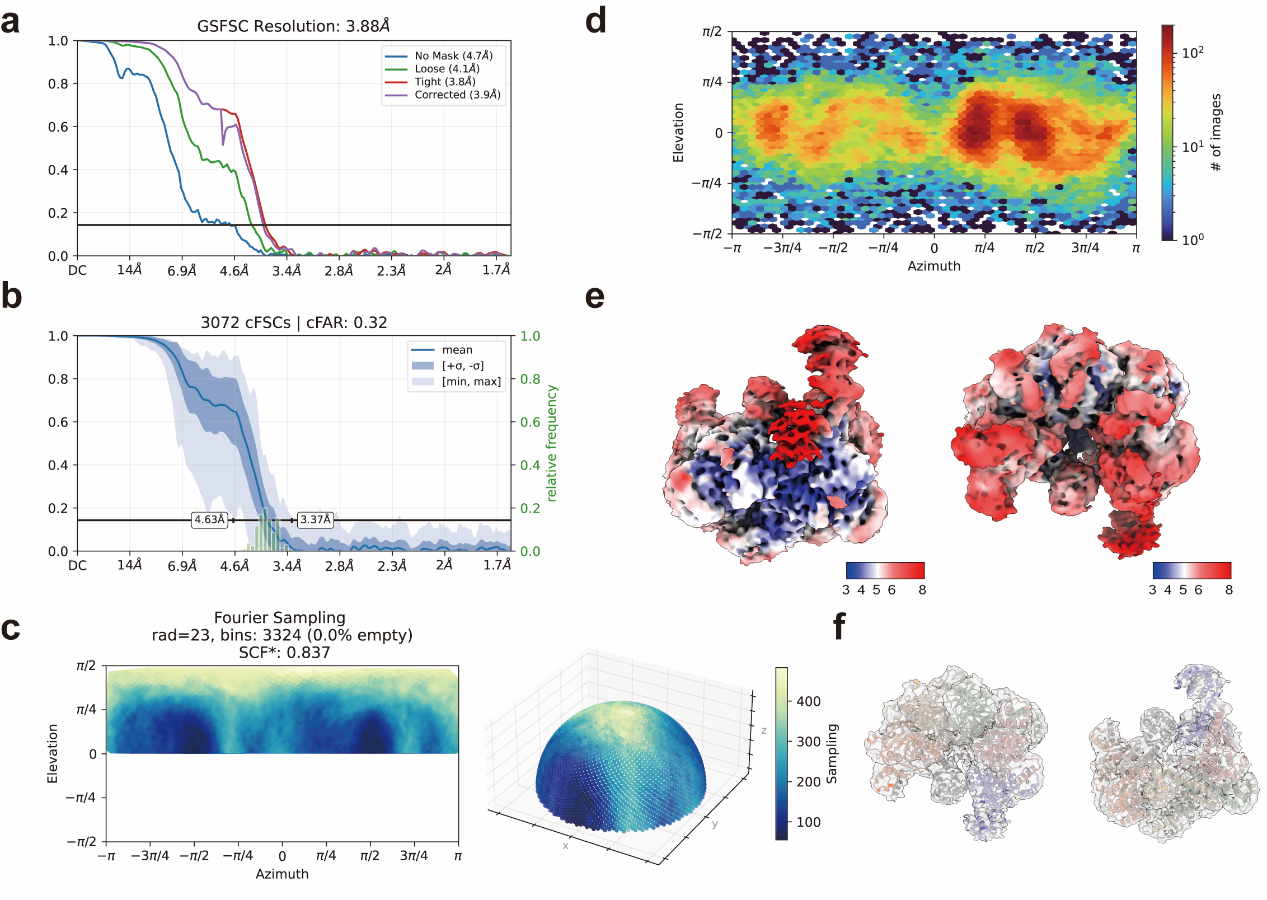


**Supplementary Data Fig. 4. The CryoSPARC analysis for single particle datasets of *Pa*DnaB hexamer in open constrict state. a.** Gold-standard Fourier shell correlation (FSC). **b.** The conical FSC curves and the conical FSC area ratio. **c.** Fourier sampling and Sampling compensation factor. **d.** Viewing direction distribution. **e.** Two views of the Cryo-EM map, colored by local resolution.


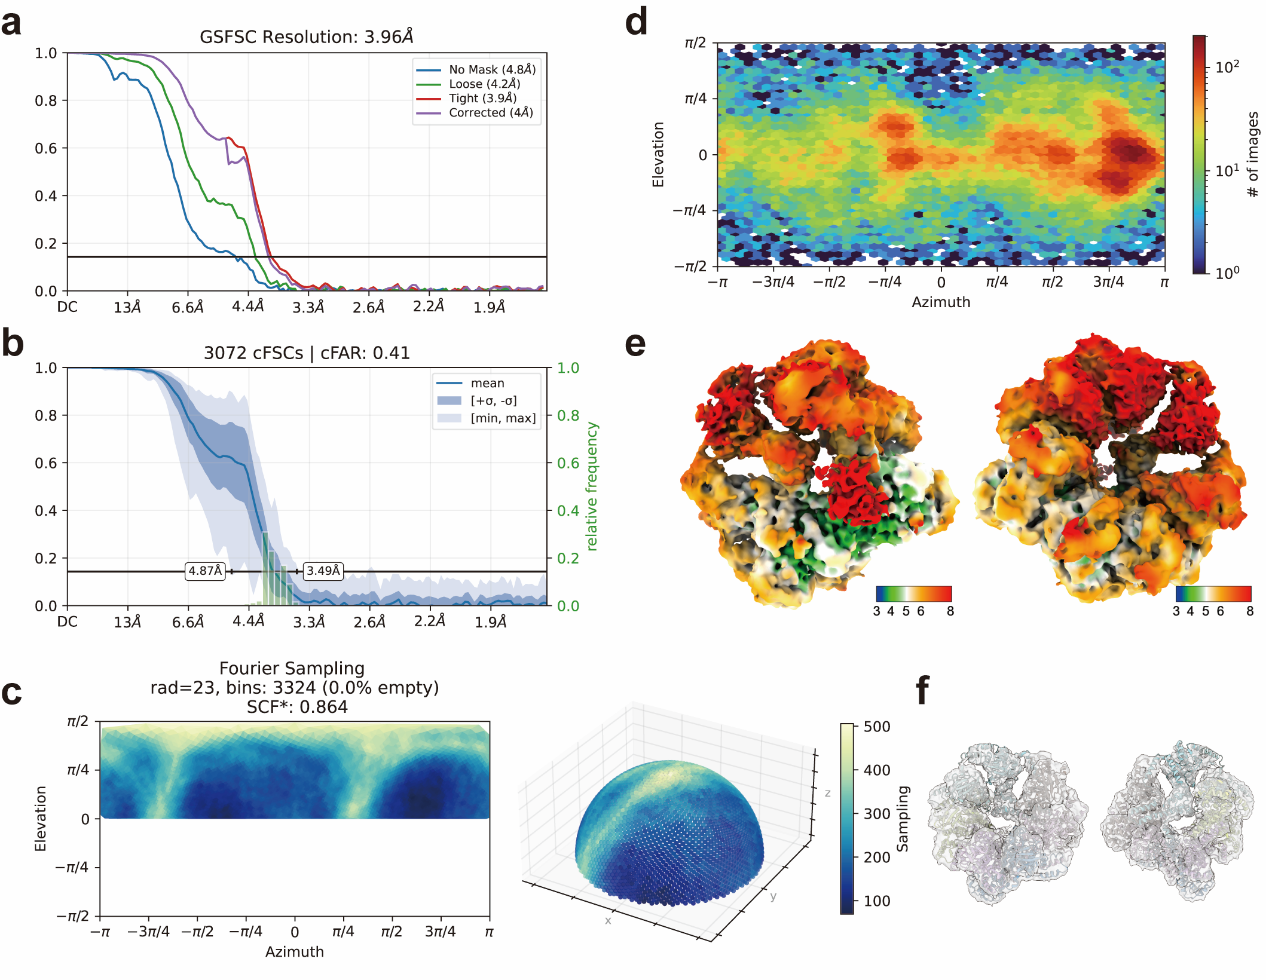


**Supplementary Data Fig. 5. The CryoSPARC analysis for single particle datasets of *Pa*DnaB heptamer (C Ⅰ) in closed constrict state. a.** Gold-standard Fourier shell correlation (FSC). **b.** The conical FSC curves and the conical FSC area ratio. **c.** Fourier sampling and Sampling compensation factor. **d.** Viewing direction distribution. **e.** Two views of the Cryo-EM map, colored by local resolution.


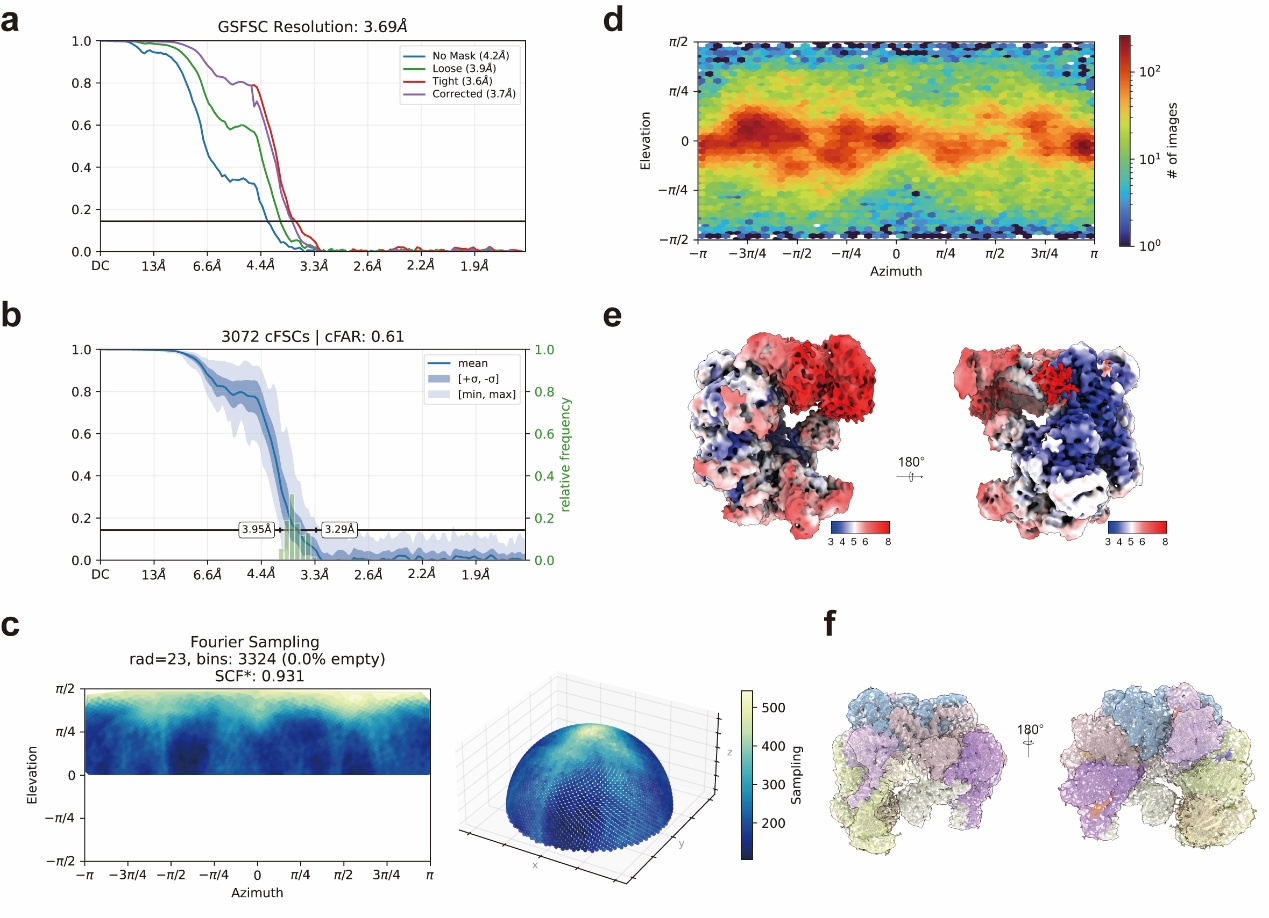


**Supplementary Data Fig. 6. The CryoSPARC analysis for single particle datasets of *Pa*DnaB heptamer (C Ⅲ) in open constrict state. a.** Gold-standard Fourier shell correlation (FSC). **b.** The conical FSC curves and the conical FSC area ratio. **c.** Fourier sampling and Sampling compensation factor. **d.** Viewing direction distribution. **e.** Two views of the Cryo-EM map, colored by local resolution.


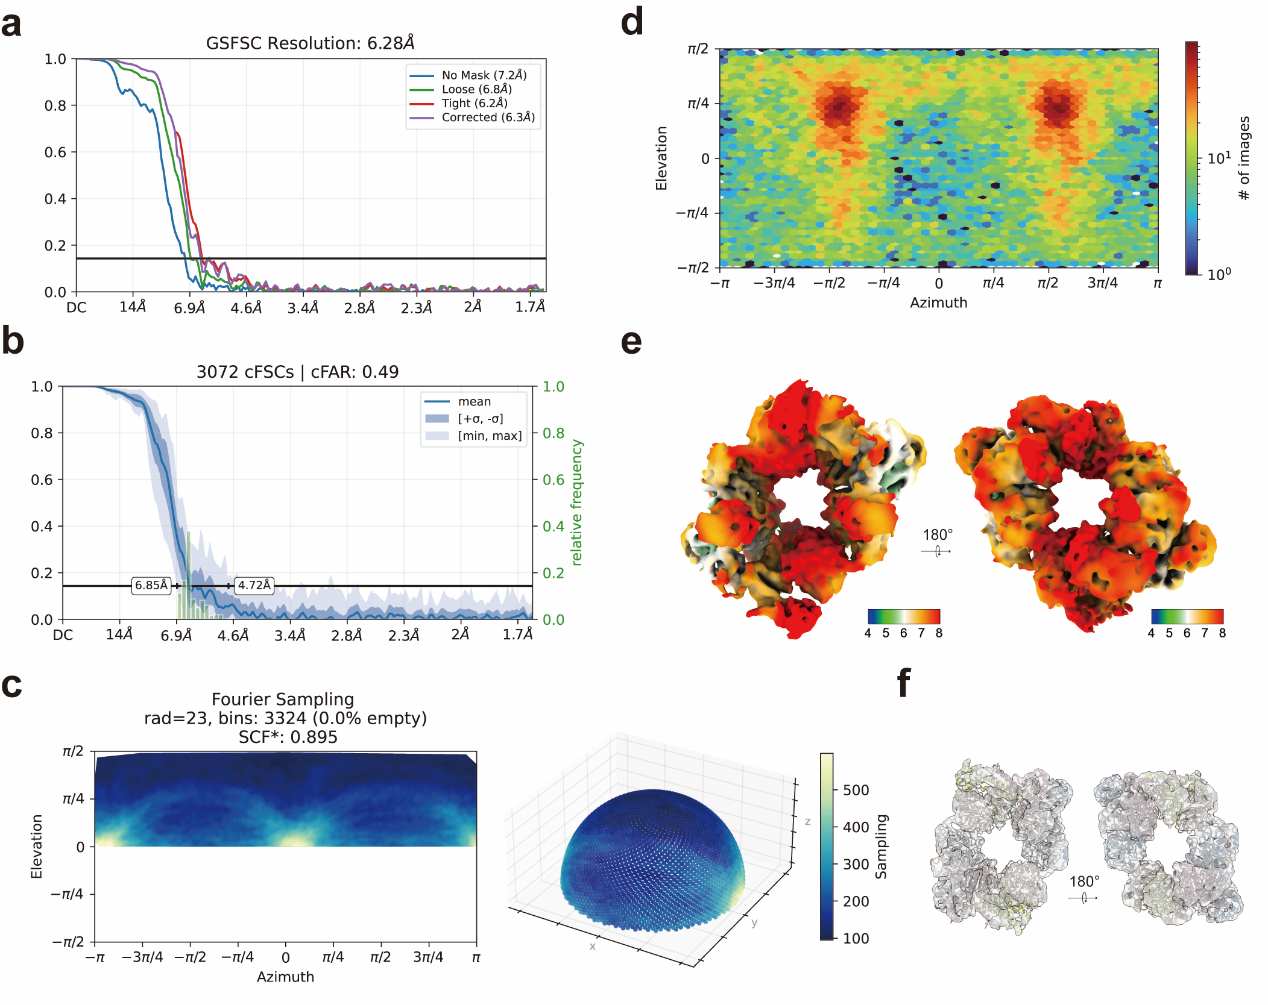


**Supplementary Data Fig. 7. The CryoSPARC analysis for single particle datasets of *Pa*DnaB Octamer. a.** Gold-standard Fourier shell correlation (FSC). **b.** The conical FSC curves and the conical FSC area ratio. **c.** Fourier sampling and Sampling compensation factor. **d.** Viewing direction distribution. **e.** Two views of the Cryo-EM map, colored by local resolution.


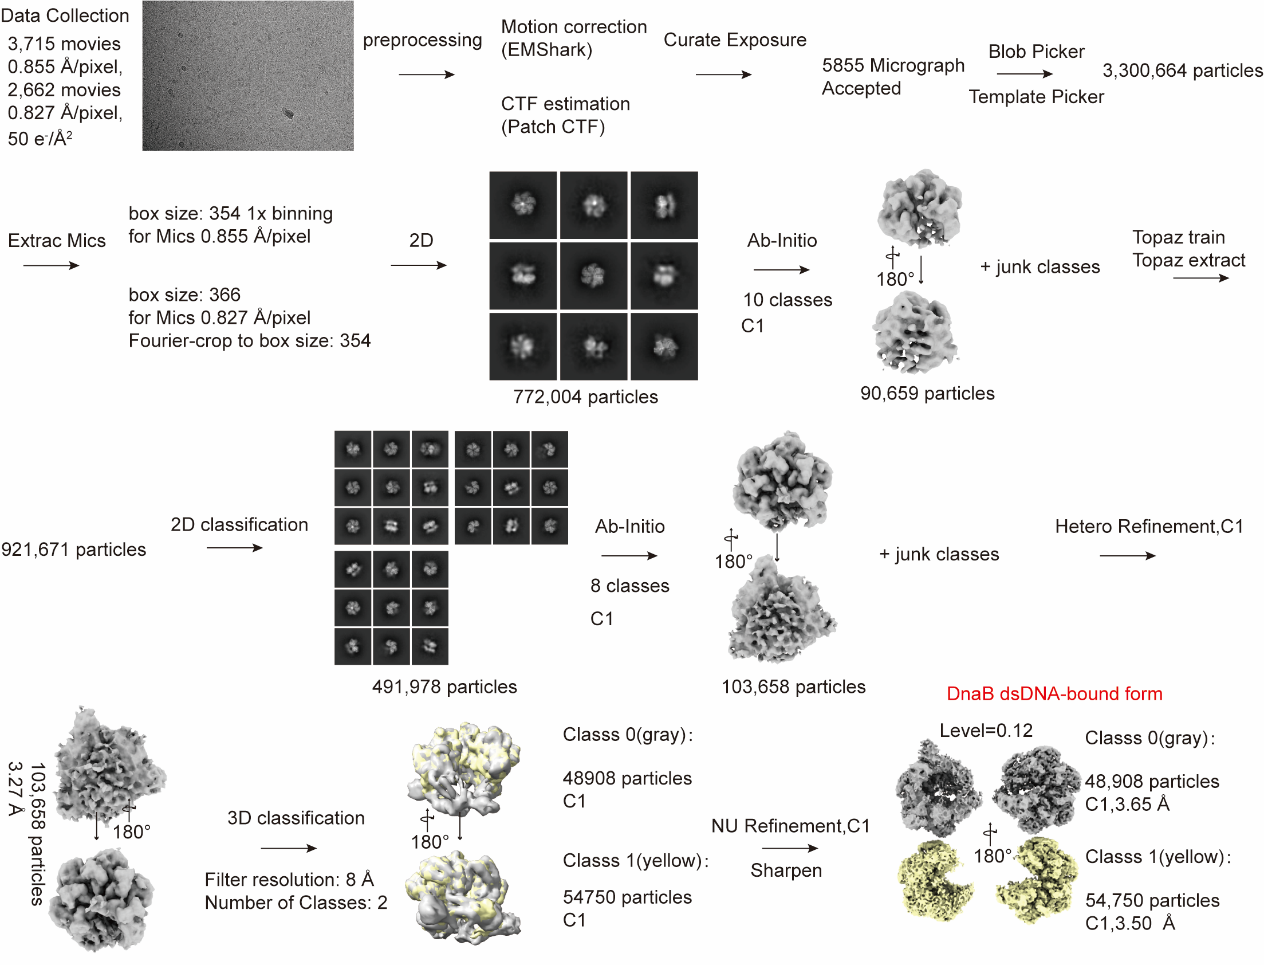


**Supplementary Data Fig. 8. Cryo-EM processing pipeline for single particle dataset of dsDNA-bound *Pa*DnaB.** Schematic workflow outlining steps for Cryo-EM data collection and processing for dsDNA-bound DnaB.


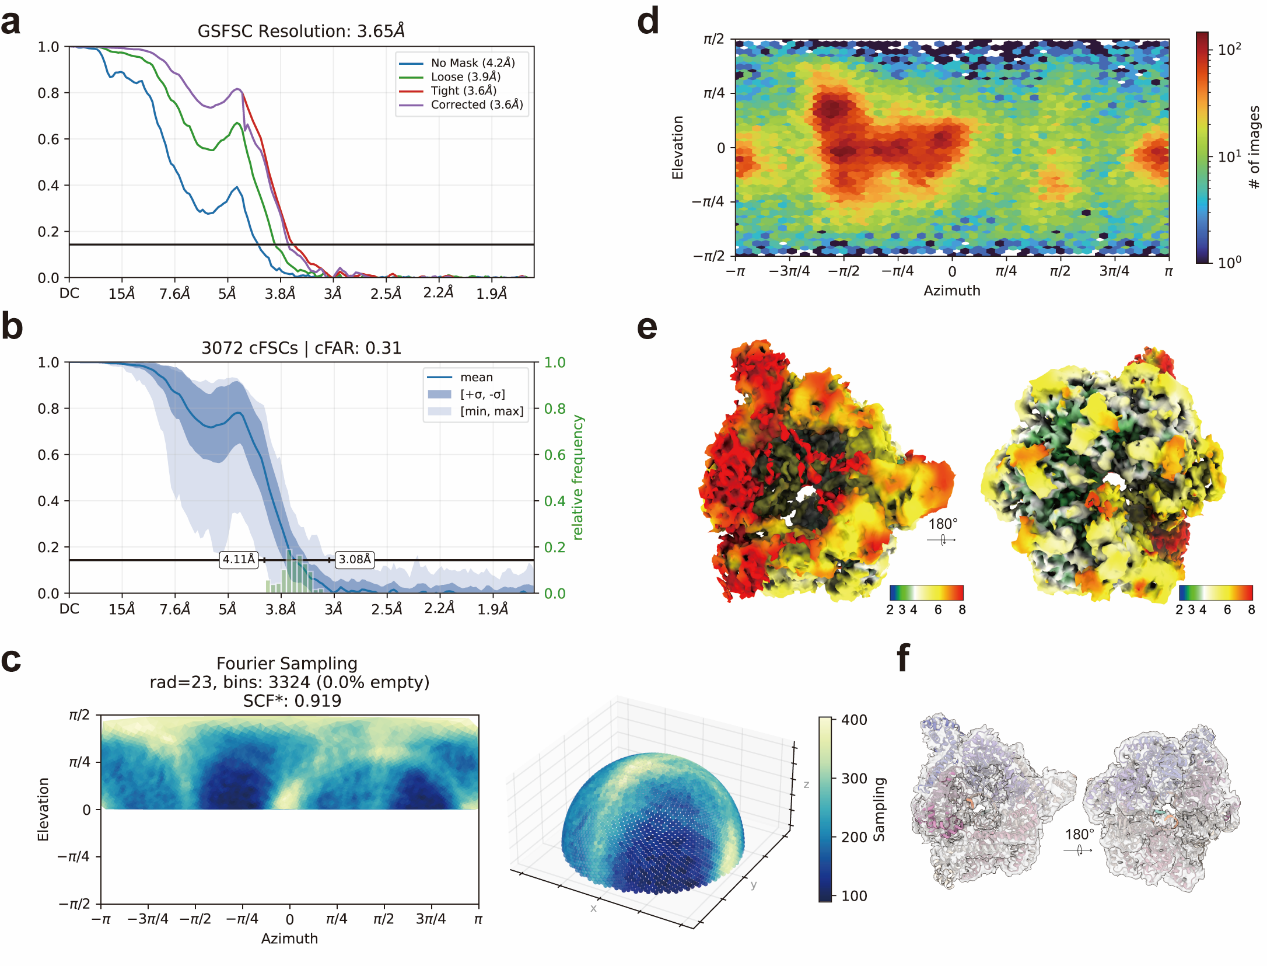


**Supplementary Data Fig. 9. The CryoSPARC analysis for a single particle dataset of dsDNA-bound *Pa*DnaB (C Ⅰ6ATP form). a.** Gold-standard Fourier shell correlation (FSC). **b.** The conical FSC curves and the conical FSC area ratio. **c.** Fourier sampling and Sampling compensation factor. **d.** Viewing direction distribution. **e.** Two views of the Cryo-EM map, colored by local resolution.


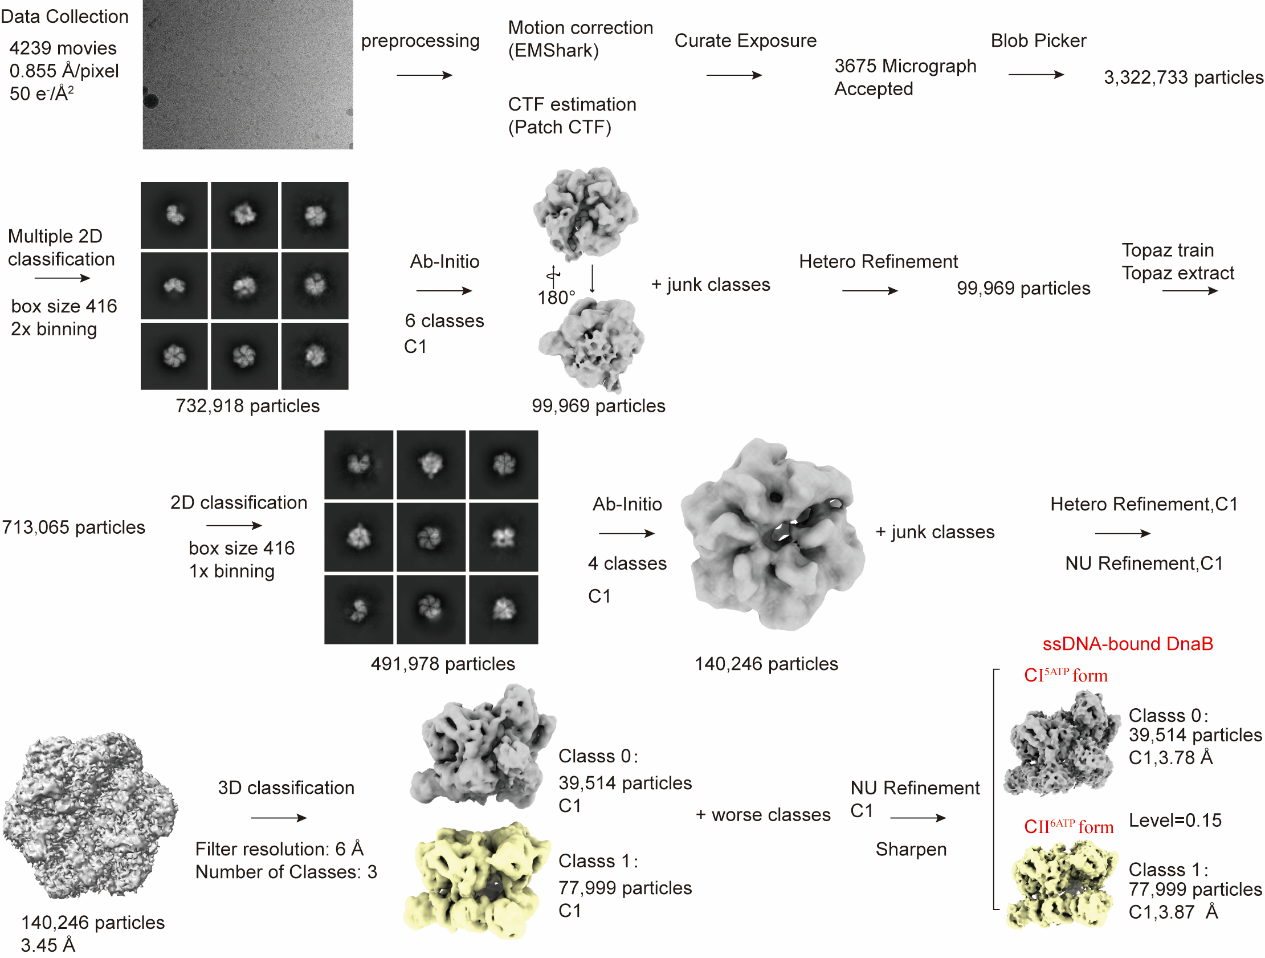


**Supplementary Data Fig. 10 Cryo-EM processing pipeline for single particle dataset of ssDNA-bound *Pa*DnaB.** Schematic workflow outlining steps for Cryo-EM data collection and processing for dsDNA-bound DnaB C Ⅰ5ATP form and C Ⅱ6ATP form.


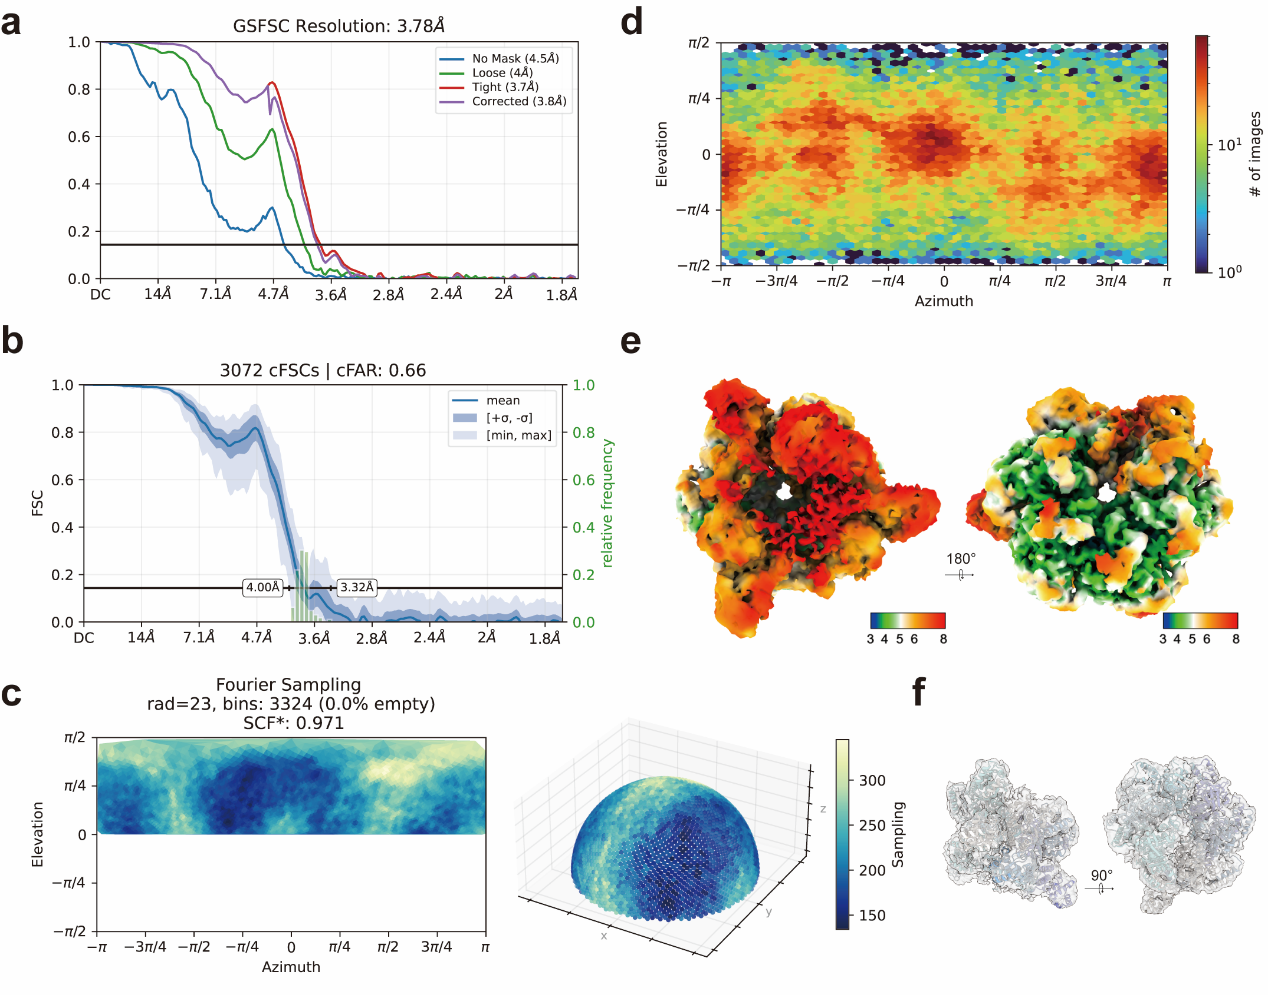


**Supplementary Data Fig. 11. The CryoSPARC analysis for the single particle dataset of ssDNA-bound *Pa*DnaB (C 15ATP form). a.** Gold-standard Fourier shell correlation (FSC). **b.** The conical FSC curves and the conical FSC area ratio. **c.** Fourier sampling and Sampling compensation factor. **d.** Viewing direction distribution. **e.** Two views of the Cryo-EM map, colored by local resolution.


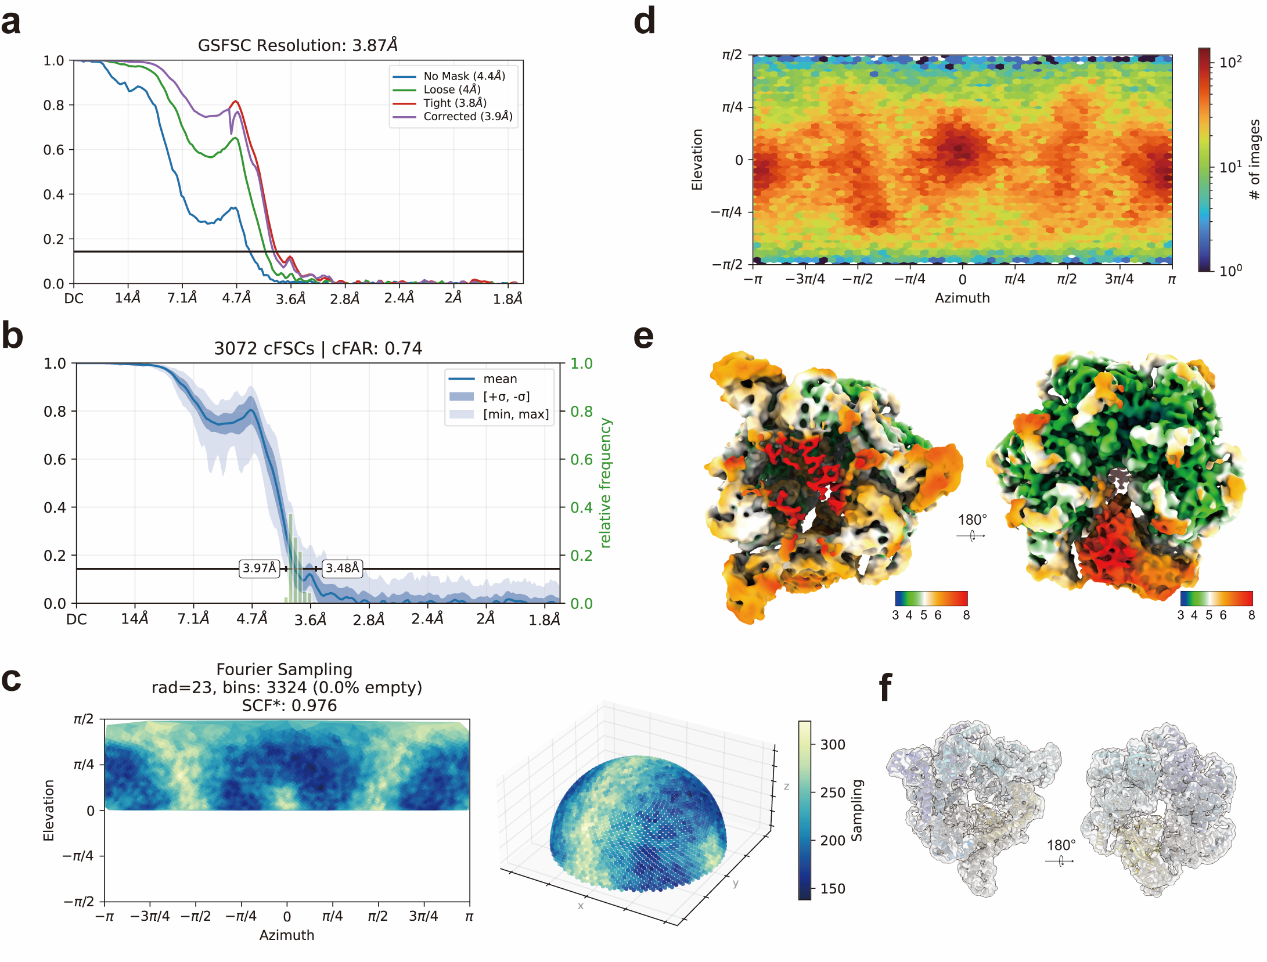


**Supplementary Data Fig. 12. The CryoSPARC analysis for the single particle dataset of ssDNA-bound *Pa*DnaB (C Ⅱ6ATP form). a.** Gold-standard Fourier shell correlation (FSC). **b.** The conical FSC curves and the conical FSC area ratio. **c.** Fourier sampling and Sampling compensation factor. **d.** Viewing direction distribution. **e.** Two views of the Cryo-EM map, colored by local resolution.


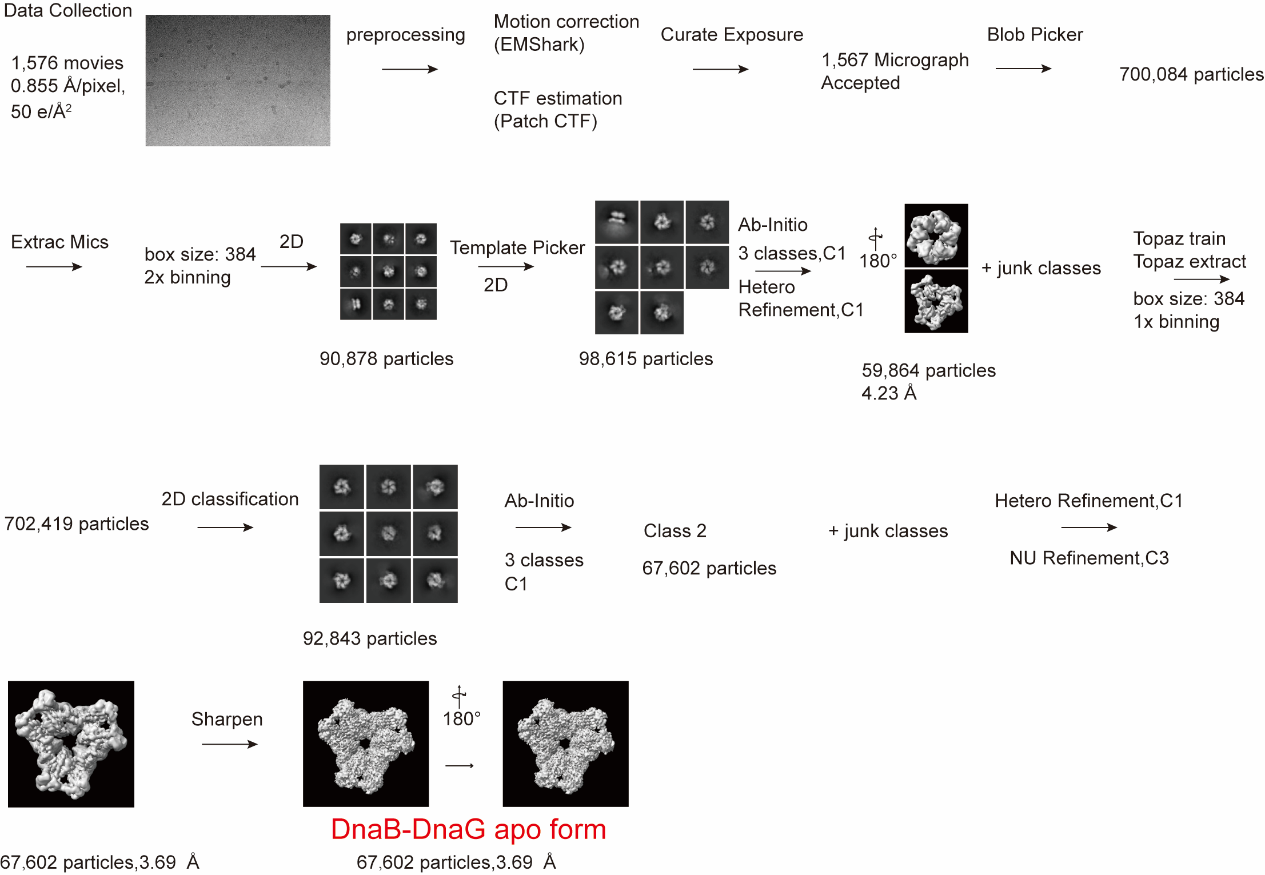


**Supplementary Data Fig. 13. Cryo-EM processing pipeline for single particle dataset of DnaBG complex (**C 1apo**).** Schematic workflow outlining steps for Cryo-EM data collection and processing for the DnaB-DnaG complex form.


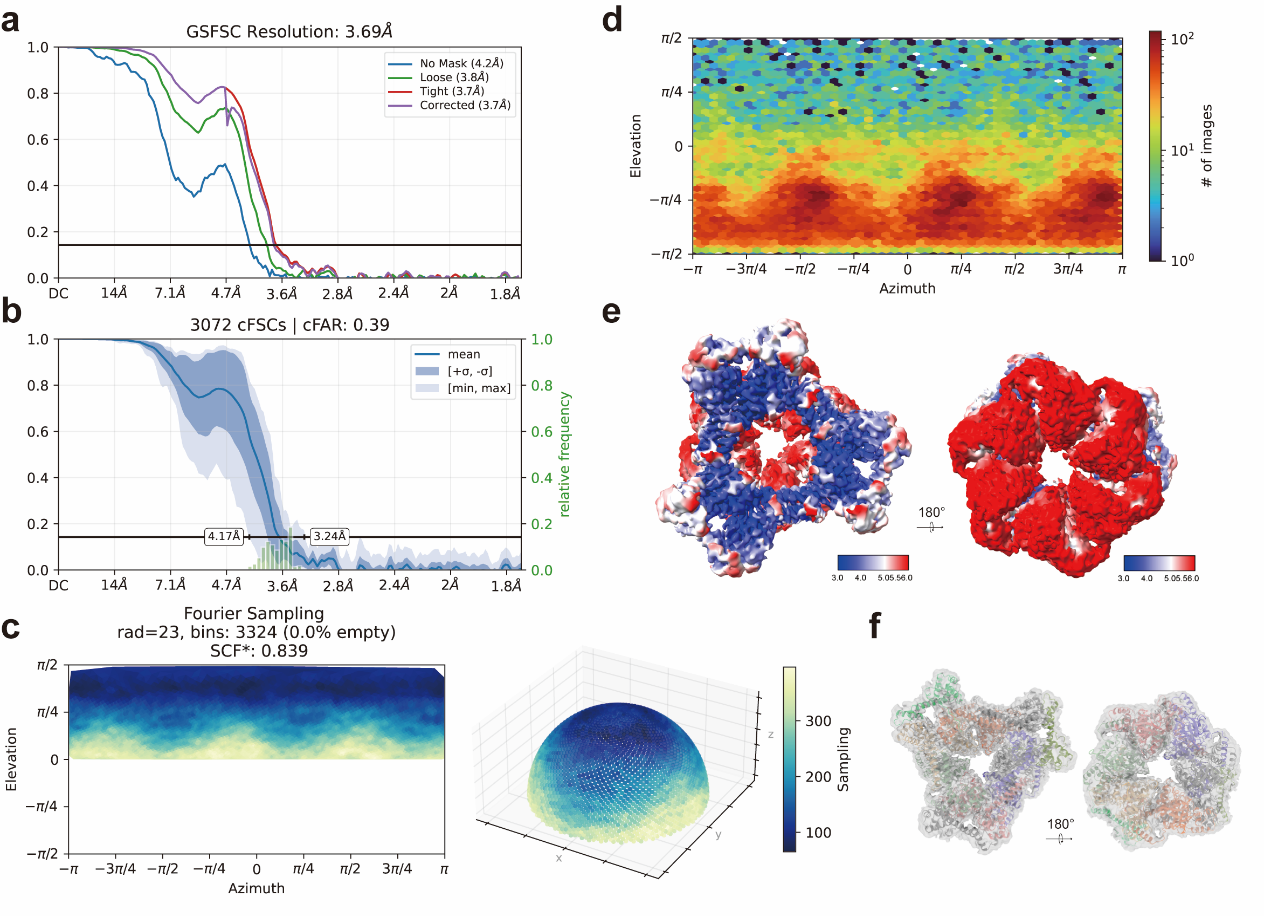


**Supplementary Data Fig. 14. The CryoSPARC analysis for the single particle dataset of DnaBG complex (**C 1apo**). a.** Gold-standard Fourier shell correlation (FSC). **b.** The conical FSC curves and the conical FSC area ratio. **c.** Fourier sampling and Sampling compensation factor. **d.** Viewing direction distribution. **e.** Two views of the Cryo-EM map, colored by local resolution.


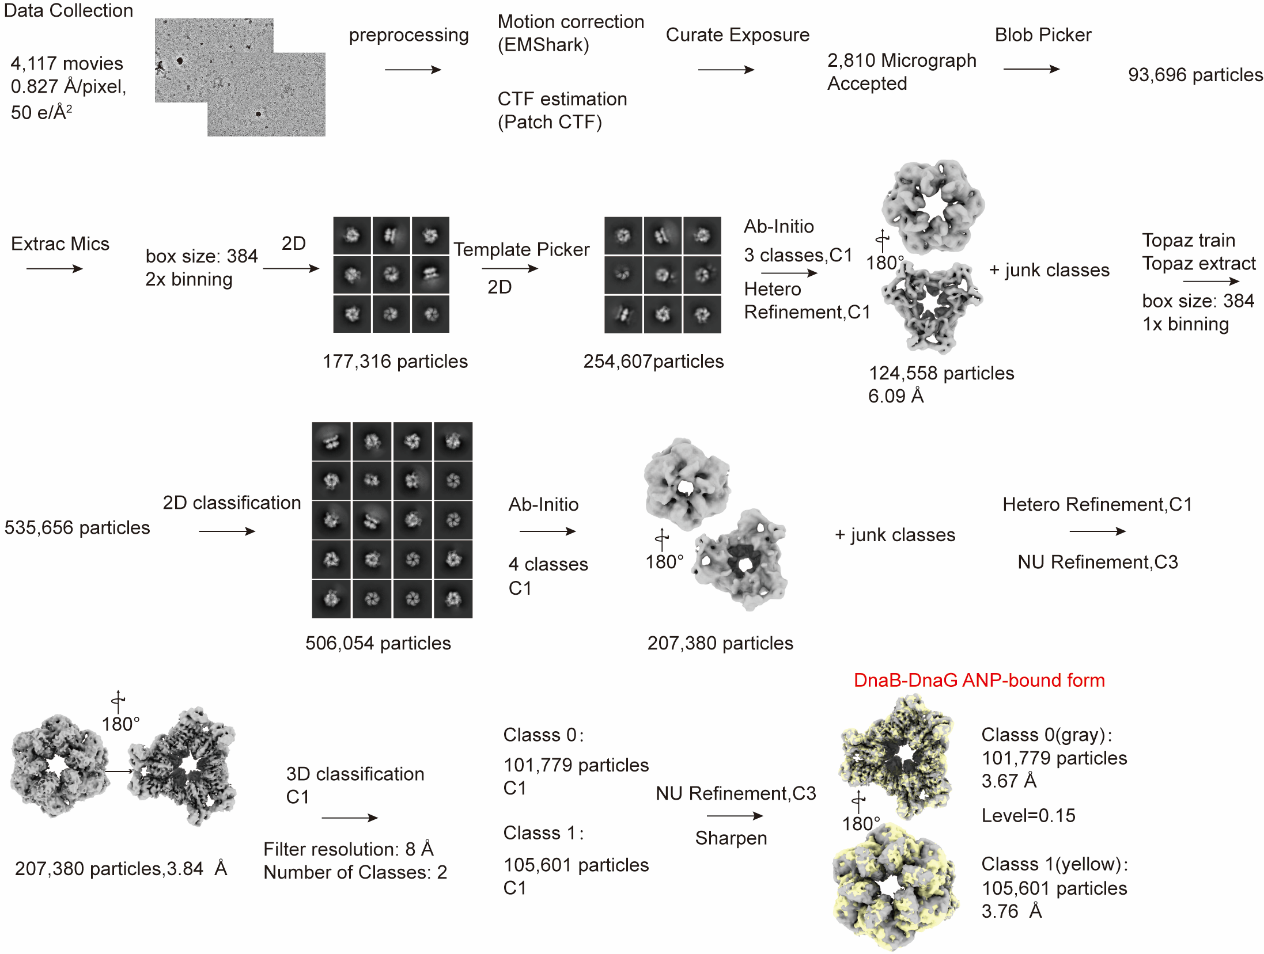


**Supplementary Data Fig. 15. Cryo-EM processing pipeline for single particle dataset of ANP-bound DnaBG complex (**C 26ATP**).** Schematic workflow outlining steps for Cryo-EM data collection and processing for ANP-bound DnaB-DnaG complex form.


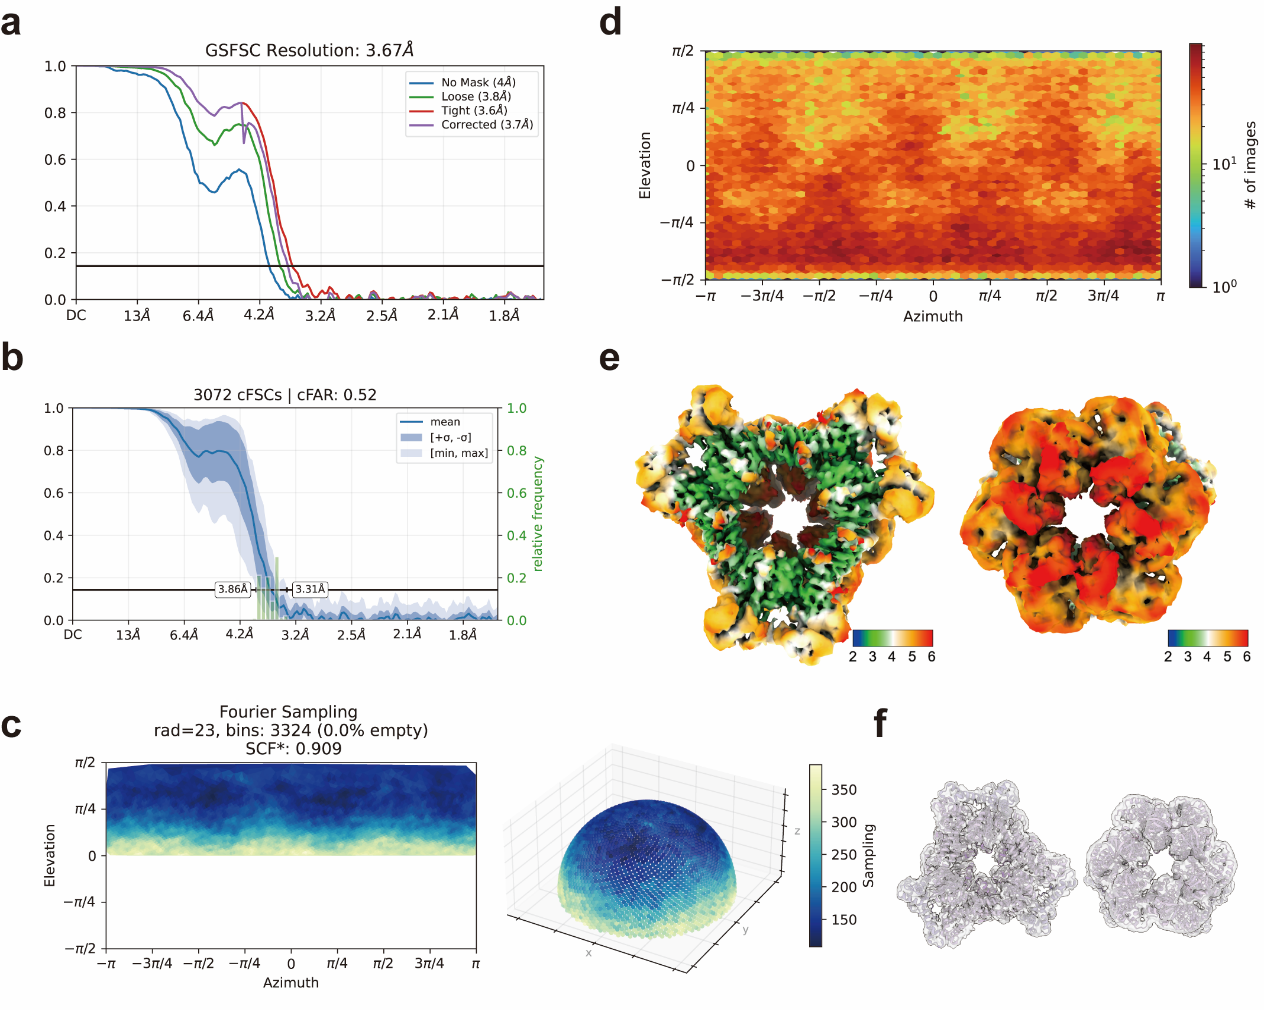


**Supplementary Data Fig. 16. The CryoSPARC analysis for the single particle dataset of ANP-bound DnaBG complex (**C 26ATP**). a.** Gold-standard Fourier shell correlation (FSC). **b.** The conical FSC curves and the conical FSC area ratio. **c.** Fourier sampling and Sampling compensation factor. **d.** Viewing direction distribution. **e.** Two views of the Cryo-EM map that were colored by local resolution.


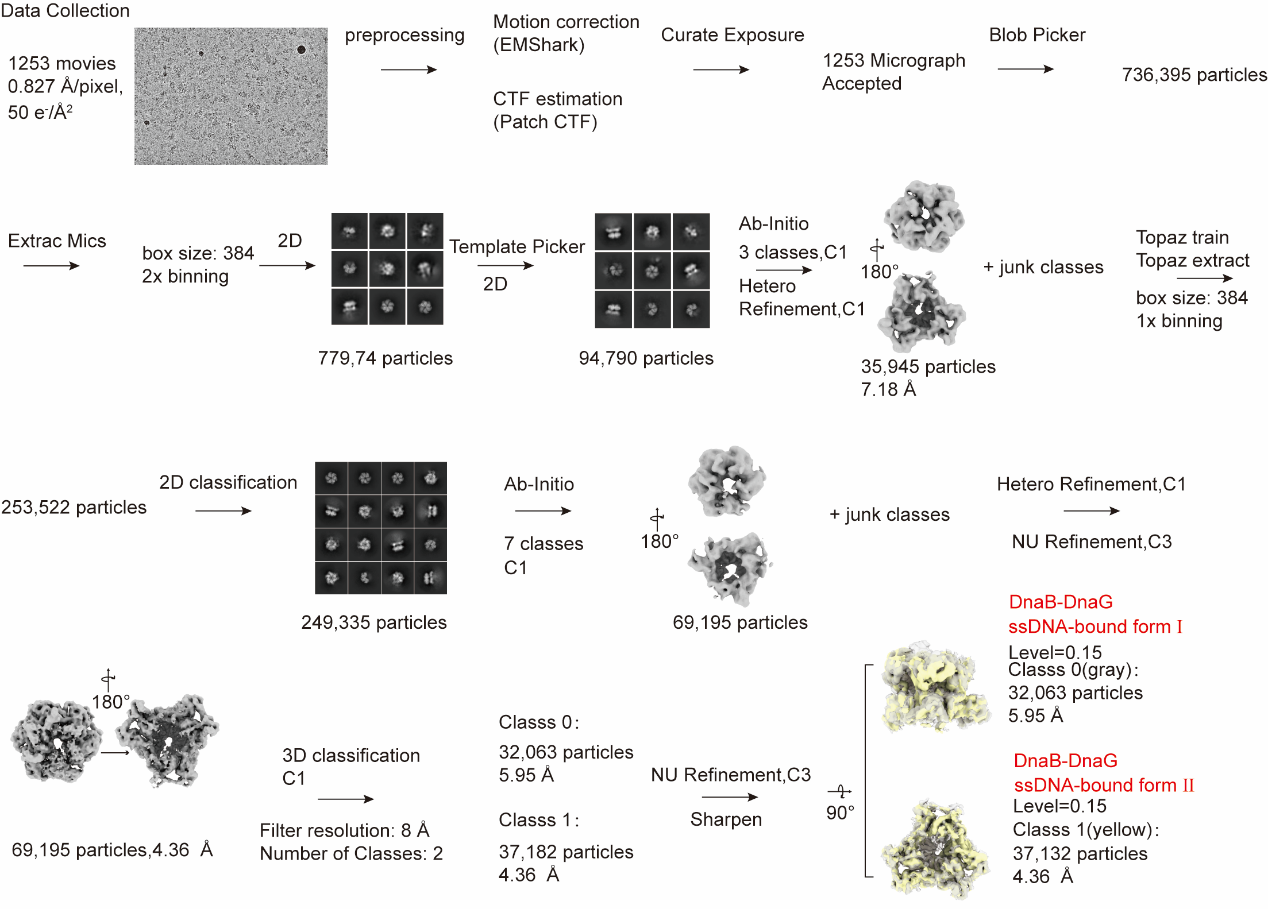


**Supplementary Data Fig. 17. Cryo-EM processing pipeline for single particle dataset of ssDNA-bound DnaBG complex.** Schematic workflow outlining steps for Cryo-EM data collection and processing for ssDNA-bound DnaBG complex C 36ATPform and C 45ATP form.


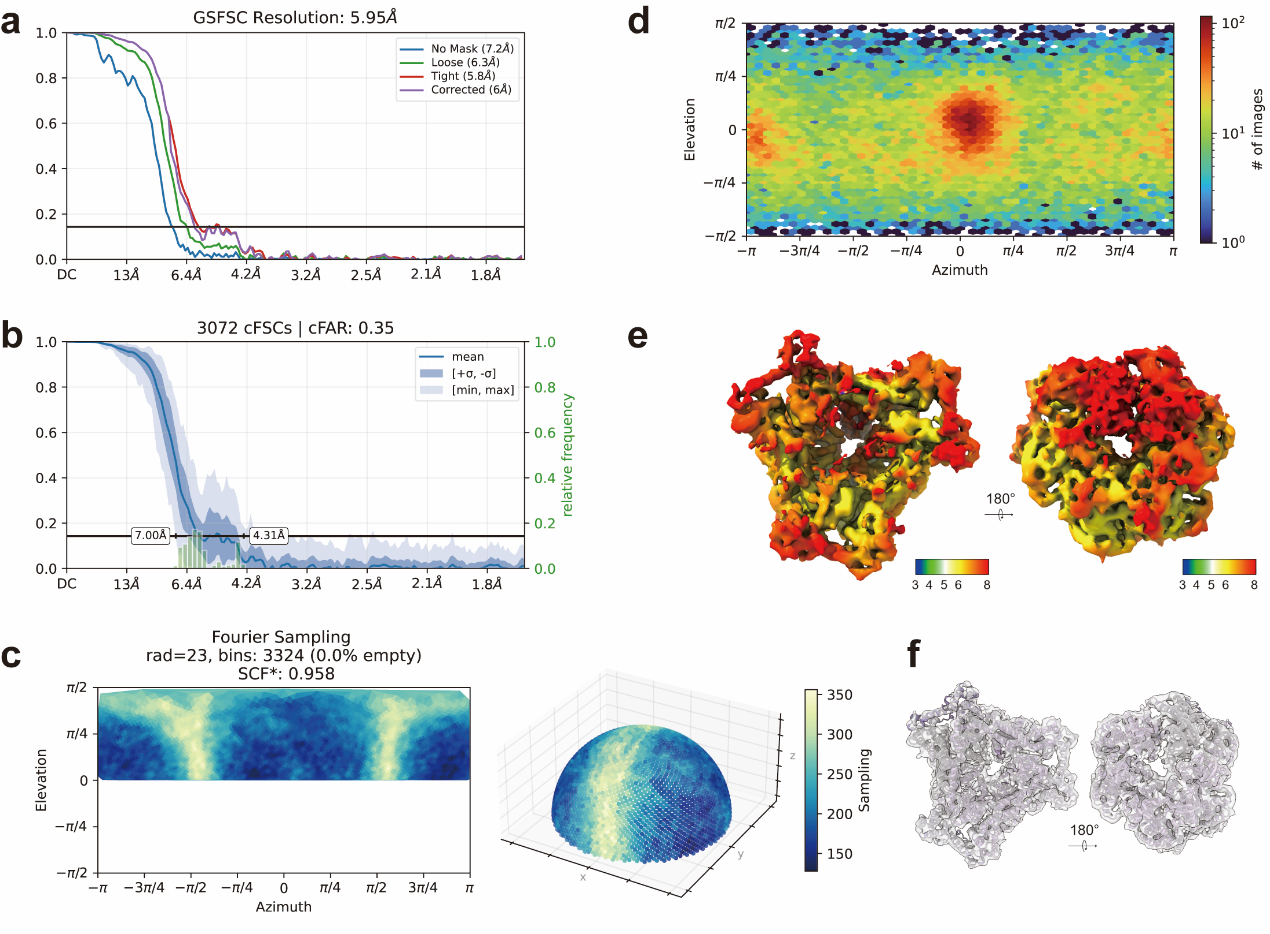


**Supplementary Data Fig. 18. The CryoSPARC analysis for the single particle dataset of ssDNA-bound DnaBG complex (C 36ATP form). a.** Gold-standard Fourier shell correlation (FSC). **b.** The conical FSC curves and the conical FSC area ratio. **c.** Fourier sampling and Sampling compensation factor. **d.** Viewing direction distribution. **e.** Two views of the Cryo-EM map that were colored by local resolution.


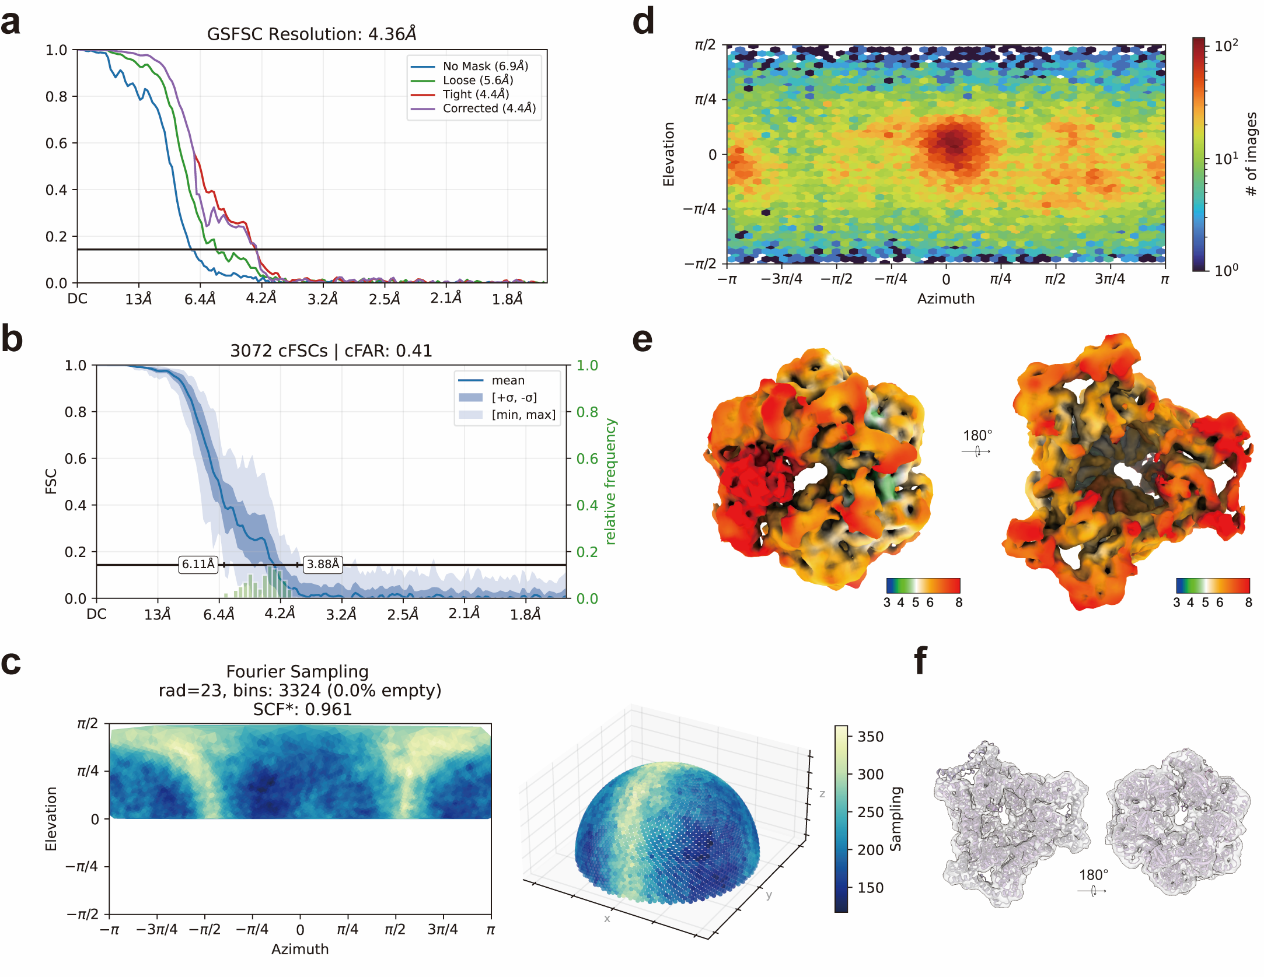


**Supplementary Data Fig. 19. The CryoSPARC analysis for the single particle dataset of ssDNA-bound DnaBG complex (C 45ATP form). a.** Gold-standard Fourier shell correlation (FSC). **b.** The conical FSC curves and the conical FSC area ratio. **c.** Fourier sampling and Sampling compensation factor. **d.** Viewing direction distribution. **e.** Two views of the Cryo-EM map that were colored by local resolution.

**Supplementary Table 1.** Cryo-EM data collection refinement and validation statistics for DnaB oligomers in apo and ANP-bound forms.


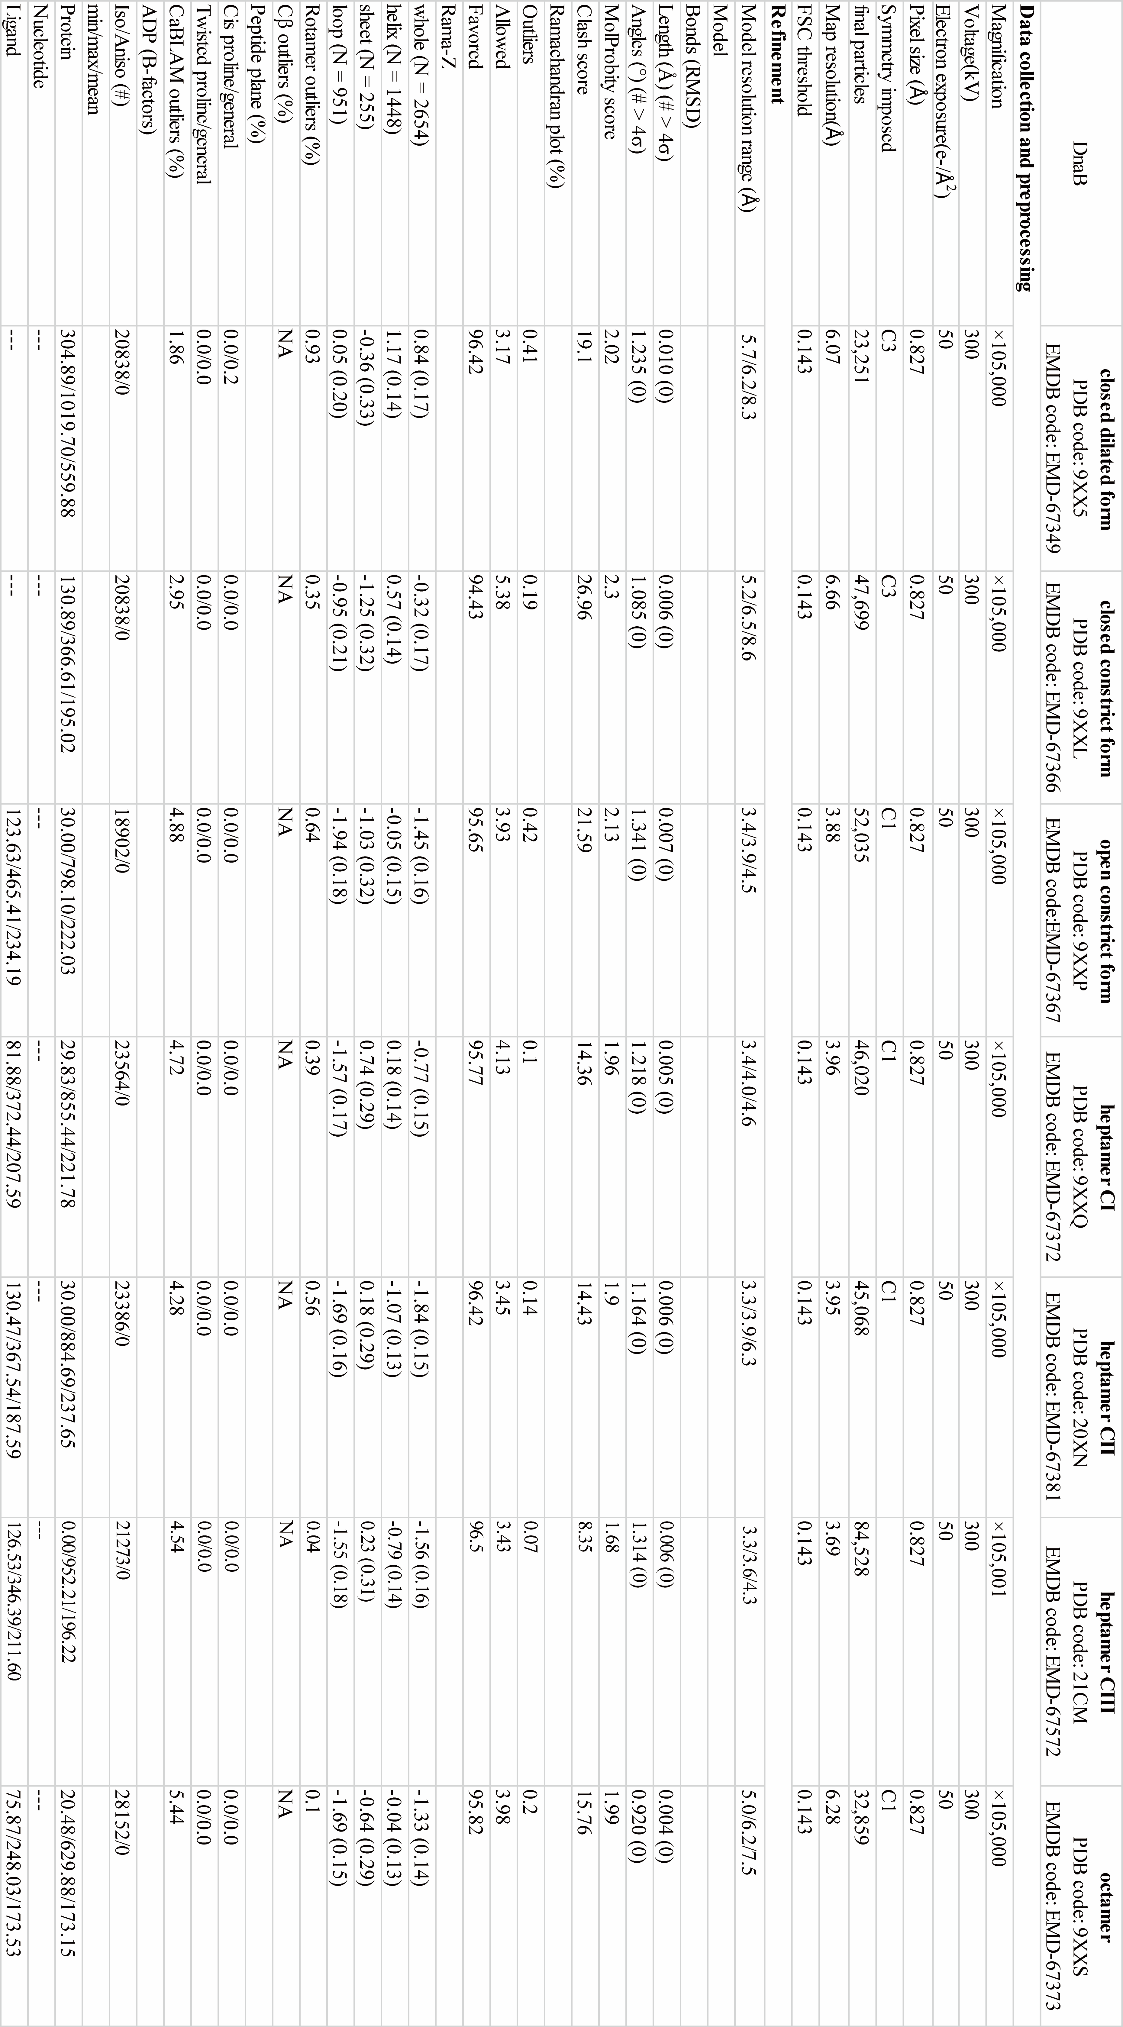


**Supplementary Table 2.** Cryo-EM data collection refinement and validation statistics for DnaB in three DNA-bound forms.


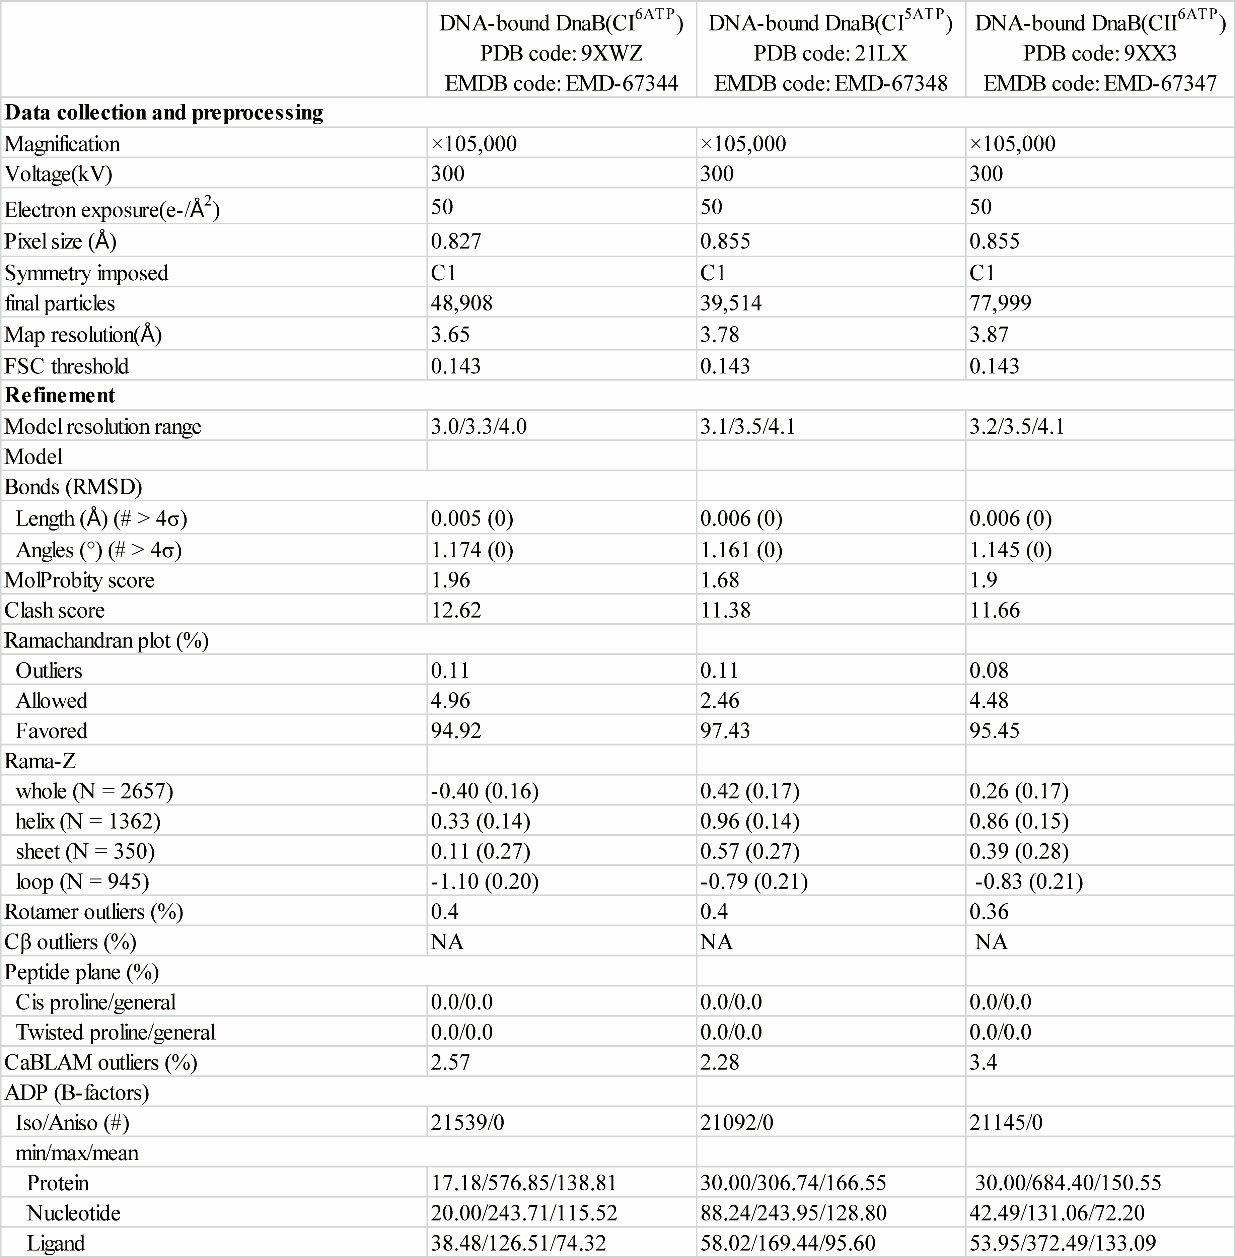


**Supplementary Table 3.** Cryo-EM data collection refinement and validation statistics for the DnaBG complex in different forms.


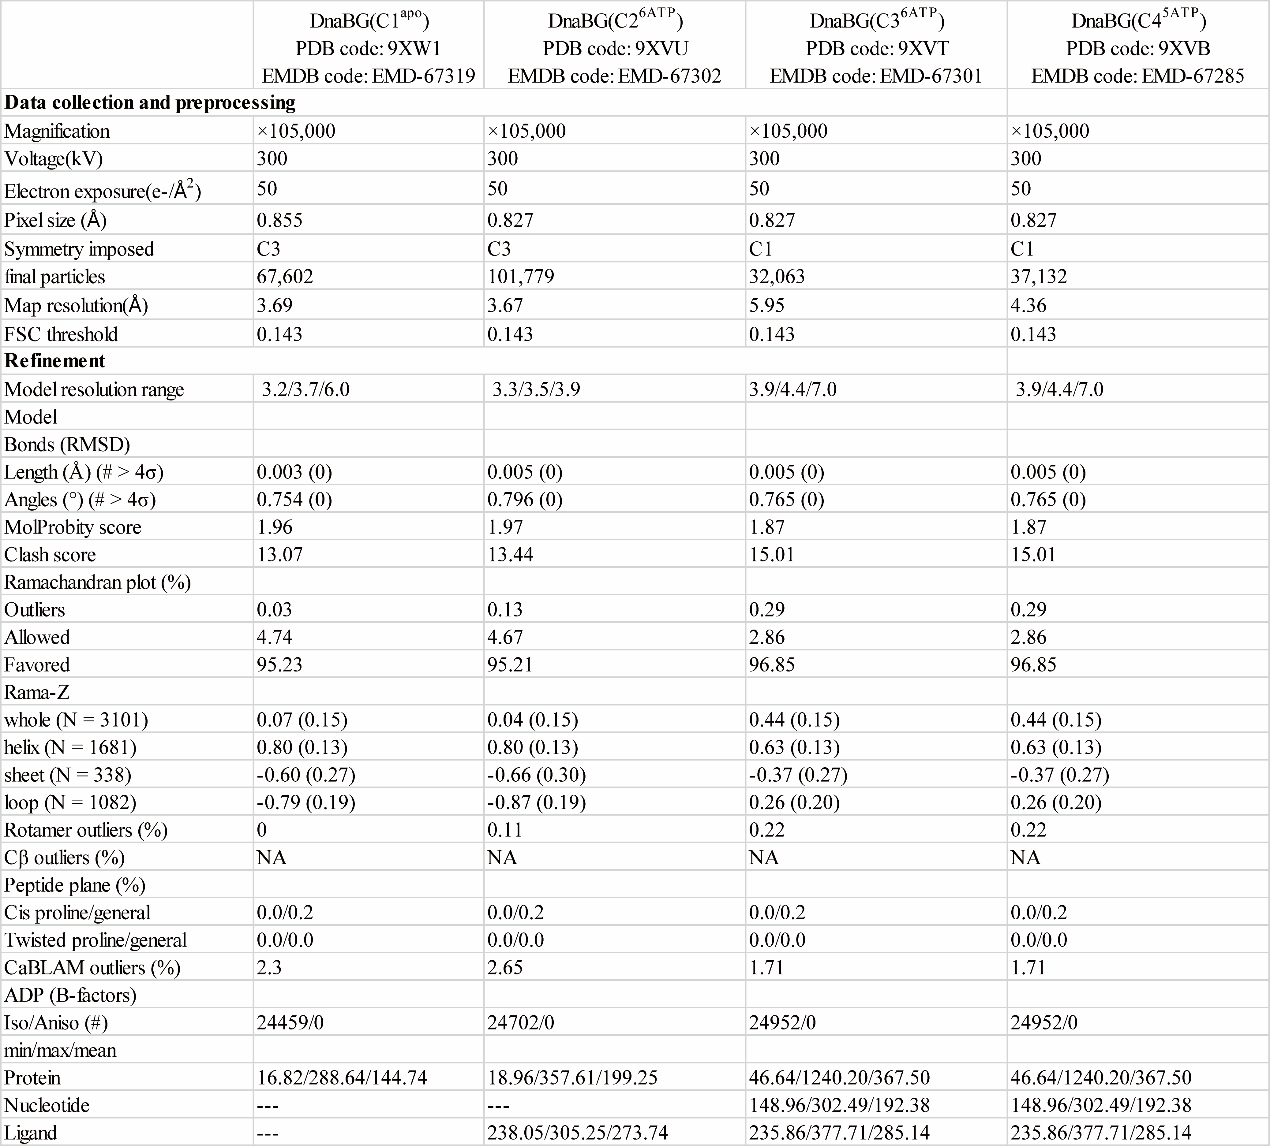


**Reference**

1 Punjani, A., Rubinstein, J. L., Fleet, D. J. & Brubaker, M. A. cryoSPARC: algorithms for rapid unsupervised cryo-EM structure determination. *Nature Methods* **14**, 290-296, doi:10.1038/nmeth.4169 (2017).

2 Rosenthal, P. B. & Henderson, R. Optimal Determination of Particle Orientation, Absolute Hand, and Contrast Loss in Single-particle Electron Cryomicroscopy. *Journal of Molecular Biology* **333**, 721-745, doi:<https://doi.org/10.1016/j.jmb.2003.07.013> (2003).

3 Abramson, J. *et al.* Accurate structure prediction of biomolecular interactions with AlphaFold 3. *Nature* **630**, 493-500, doi:10.1038/s41586-024-07487-w (2024).

4 Pettersen, E. F. *et al.* UCSF ChimeraX: Structure visualization for researchers, educators, and developers. *Protein science : a publication of the Protein Society* **30**, 70-82, doi:10.1002/pro.3943 (2021).

5 Luo, D. *et al.* DiffFit: Visually-Guided Differentiable Fitting of Molecule Structures to a Cryo-EM Map. *IEEE transactions on visualization and computer graphics* **31**, 558-568, doi:10.1109/tvcg.2024.3456404 (2025).

6 Adams, P. D. *et al.* PHENIX: a comprehensive Python-based system for macromolecular structure solution. *Acta crystallographica. Section D, Biological crystallography* **66**, 213-221, doi:10.1107/s0907444909052925 (2010).

7 Emsley, P. & Cowtan, K. Coot: model-building tools for molecular graphics. *Acta crystallographica. Section D, Biological crystallography* **60**, 2126-2132, doi:10.1107/s0907444904019158 (2004).

8 Davis, I. W. *et al.* MolProbity: all-atom contacts and structure validation for proteins and nucleic acids. *Nucleic Acids Res* **35**, W375-383, doi:10.1093/nar/gkm216 (2007).
